# Supplementary material for: Synergetic effect dependence on activated oxygen in the interface of NiOx-modified Pt nanoparticles for the CO oxidation from first-principles
Source: Royal Society of Chemistry journal article supplement (doi:10.1039/d1cp00149c), 2021-01-01
Supplement: d1cp00149c1.pdf [file d1cp00149c1.pdf]

## Supporting Information

### **Synergetic effect dependence on activated oxygen in the interface of NiO<sub>x</sub> modified Pt nanoparticles for CO oxidation from first-principles**

Zihang Yao<sup>1</sup>, Jiaqiang Yang<sup>2</sup>, Zhang Liu<sup>2</sup>, Bin Shan<sup>2</sup>, Rong Chen<sup>3</sup>, Yanwei Wen<sup>2,\*</sup>,  
and Yanli Li<sup>1,\*</sup>

<sup>1</sup> *Department of Physics and Institute of Condensed Matter Physics, School of  
Science, Wuhan University of Technology, Wuhan 430070, China*

<sup>2</sup> *State Key Laboratory of Materials Processing and Die and Mould Technology  
and School of Materials Science and Engineering, Huazhong University of Science  
and Technology, Wuhan 430074, China*

<sup>3</sup> *State Key Laboratory of Digital Manufacturing Equipment and Technology and  
School of Mechanical Science and Engineering, Huazhong University of Science and  
Technology, Wuhan 430074, China.*

---

\* Author to whom correspondence should be addressed. E-mail: ywwen@hust.edu.cn, liyanli128@163.com.

---

## 1. Benchmarking calculation for calculation methods on NiO<sub>x</sub>/Pt

Some benchmarking calculations has been done to show that our current computational methods are reasonably good in describing the CO oxidation process on NiO<sub>x</sub>/Pt.

We calculated the CO adsorption energy and energy barrier of TS1 on Ni<sub>5</sub>O<sub>4</sub>/Pt<sub>(100)</sub> as an example with a higher cutoff energy of 500 eV. It is found the energy change is within 0.02 eV, which is negligible comparing with the adsorption energy and barrier. Moreover, a more dense KPOINTS with 5x5x1 mesh is also tested for comparison and the adsorption energy and barrier are converged. These results are listed in Table S1.

**Table S1.** Convergence test on CO adsorption energy and energy barrier of TS1 on Ni<sub>5</sub>O<sub>4</sub>/Pt(100).

|              | E <sub>a</sub> (CO) | E <sub>b</sub> (TS1) |
|--------------|---------------------|----------------------|
| Standard     | -1.875              | 0.934                |
| 5x5x1 k-mesh | -1.878              | 0.934                |

D2 or D3 correction is essential in hydrogen bonding or large molecule adsorption systems which vdW interaction plays an important role. While for the small molecule CO and O<sub>2</sub>, the calculated results shows that those corrected values are negligible to the strong chemical bonding (~2.0 eV for CO adsorption on Pt). The calculated CO adsorption energy and energy barrier of TS1 on NiO<sub>x</sub>/Pt<sub>edge</sub> with D3 correction are listed in Table S2. As can be seen, the corrected values are only increased by ~0.1 eV.

**Table S2.** The CO adsorption energy (E<sub>a</sub>(CO))and the energy barrier of TS1 (E<sub>b</sub>(TS1)) on NiO<sub>x</sub>/Pt<sub>edge</sub>.

|                       | E <sub>a</sub> (CO) | E <sub>b</sub> (TS1) |
|-----------------------|---------------------|----------------------|
| Without D3 correction | -2.11               | 0.50                 |
| With D3 correction    | -2.25               | 0.56                 |

---

## 2. Supplementary Figures and Tables

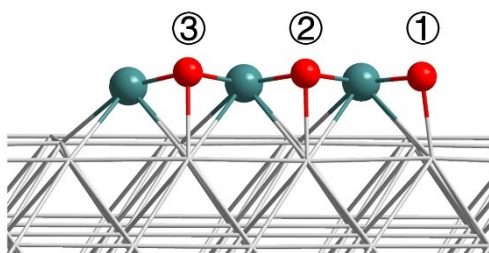

**Figure S1.** Structure of Ni<sub>3</sub>O<sub>3</sub> atomic chain on Pt edge. The linear structure of Ni<sub>3</sub>O<sub>3</sub>

**Table S3.**  $E_{ov}$  of O labeled in Figure S1.

| O atom label | $E_{ov}/\text{eV}$ |
|--------------|--------------------|
| ①            | 1.09               |
| ②            | 1.49               |
| ③            | 2.02               |

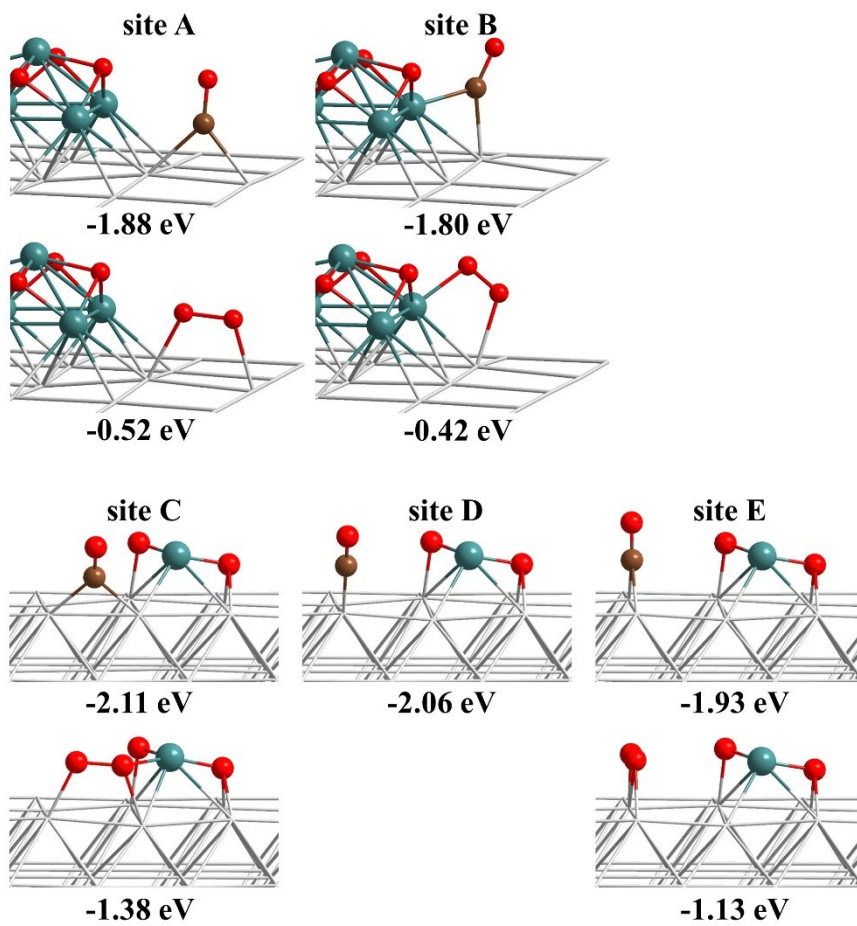

**Figure S2.** Atomic structures of CO and O<sub>2</sub> adsorption on sites of NiO<sub>x</sub>/Pt.

---

**Table S4.** Pt-C and Pt-O bond lengths of CO and O<sub>2</sub> adsorption on clean Pt surface sites and NiO<sub>x</sub>-Pt interfacial sites.

| Adsorption sites |                | d(Pt-C)    | d(Pt-O)    |
|------------------|----------------|------------|------------|
| Pt(100)          | Bridge         | 2.02       | 1.98       |
|                  | Atop           | 1.84       | -          |
| Pt(211)          | Edge-bridge    | 2.01       | 1.97       |
|                  | Edge-atop      | 1.85       | -          |
|                  | Terrace-bridge | 2.04, 2.01 | 1.98, 1.99 |
| Facet            | A              | 2.06, 1.99 | 2.05, 1.96 |
|                  | B              | 1.94       | 2.01       |
| Edge             | C              | 2.02, 1.99 | 2.03, 1.98 |
|                  | D              | 1.85       | -          |
|                  | E              | 2.04, 2.01 | 1.98, 1.99 |

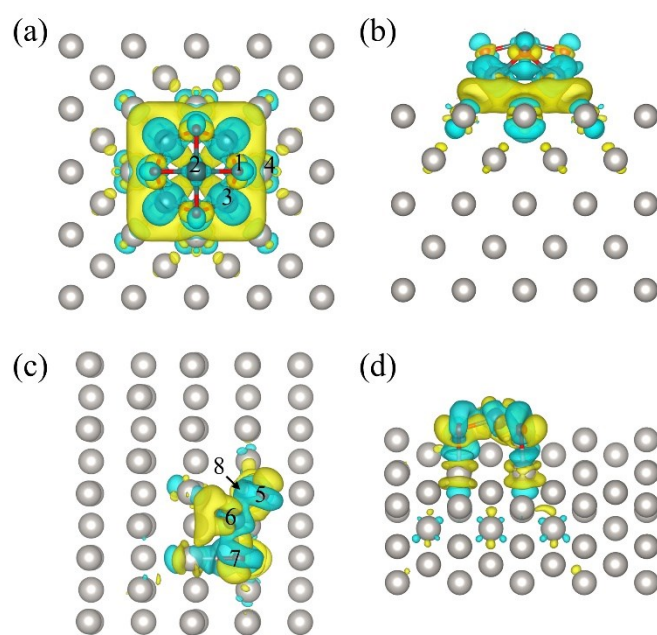

**Figure S3.** (a) and (b) Charge density difference of  $\text{NiO}_x/\text{Pt}_{(100)}$  in top view and side view. (c) and (d) Charge density difference of  $\text{NiO}_x/\text{Pt}_{\text{edge}}$  in top view and side view. Yellow (blue) isosurface represents charge accumulation (depletion). Bader charge analysis are applied to atoms 1-8 and the results are shown in Table S3.

**Table S5.** Element name and charge transfer of atoms 1-8 in Figure S3.

| Label | Element | Charge transfer |
|-------|---------|-----------------|
| 1     | O       | $0.75e$         |
| 2     | Ni      | $-0.92e$        |
| 3     | Ni      | $-0.65e$        |
| 4     | Pt      | $0.16e$         |
| 5     | O       | $0.65e$         |
| 6     | Ni      | $-0.70e$        |
| 7     | O       | $0.70e$         |
| 8     | Pt      | $-0.31e$        |

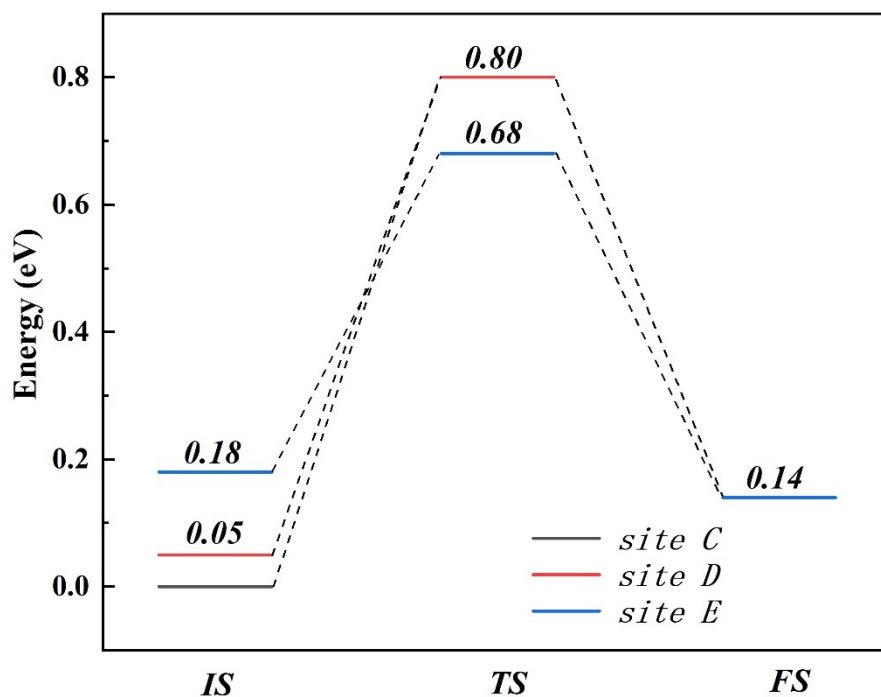

**Figure S4.** Energy profile of CO oxidation after CO adsorption at site C, site D and site E. The difference of  $E_a$  at various sites is small, and the transition state (TS) of CO oxidation at site E is lower in energy, therefore CO adsorption at site E is considered in the catalytic cycle of  $\text{NiO}_x/\text{Pt}_{\text{edge}}$ .

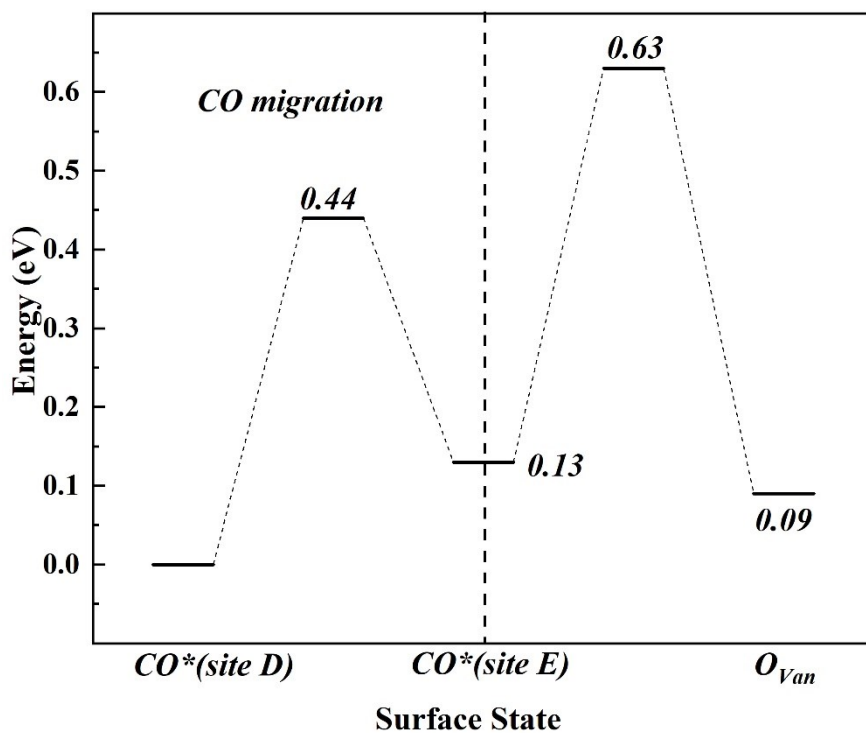

**Figure S5.** Energy profile of CO migration (at the left region) and the first CO<sub>2</sub> formation (at the right region). The barrier of CO<sub>2</sub> formation at site D is 0.75 eV according to Figure S4, therefore CO migration can occur prior to oxidation at site D.



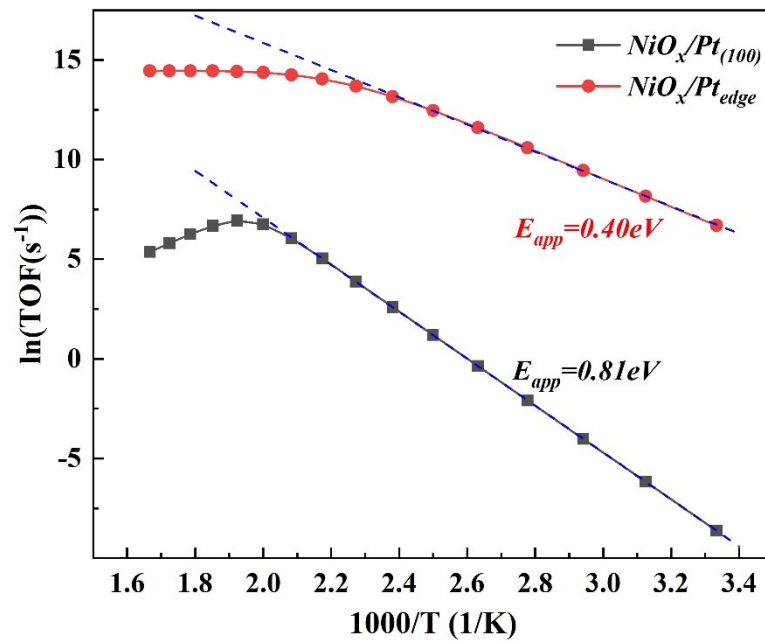

**Figure S6.** The apparent activation energy ( $E_{app}$ ) of  $\text{NiO}_x/\text{Pt}_{\text{edge}}$  and  $\text{NiO}_x/\text{Pt}_{(100)}$ .

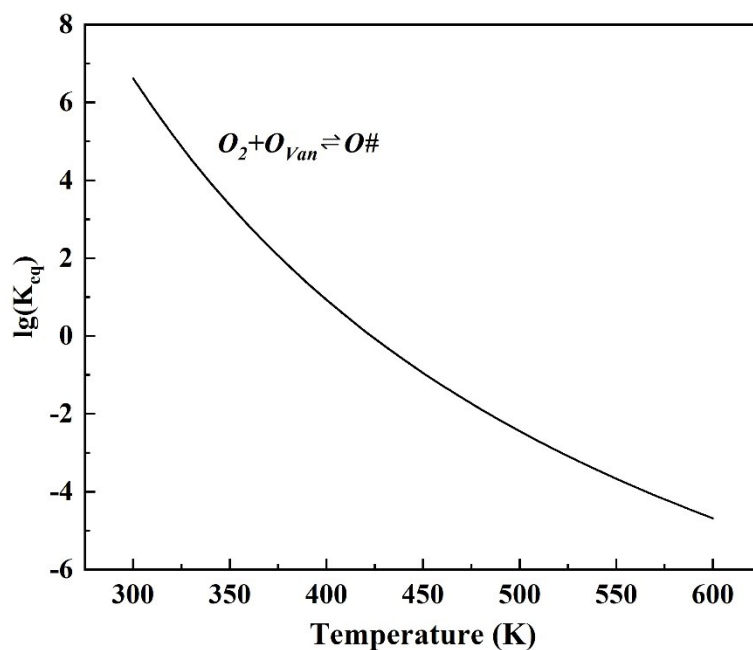

**Figure S7.** The equilibrium constant of  $O_2$  adsorption on oxygen vacancy site of  $NiO_x/Pt_{(100)}$  as function of temperature.

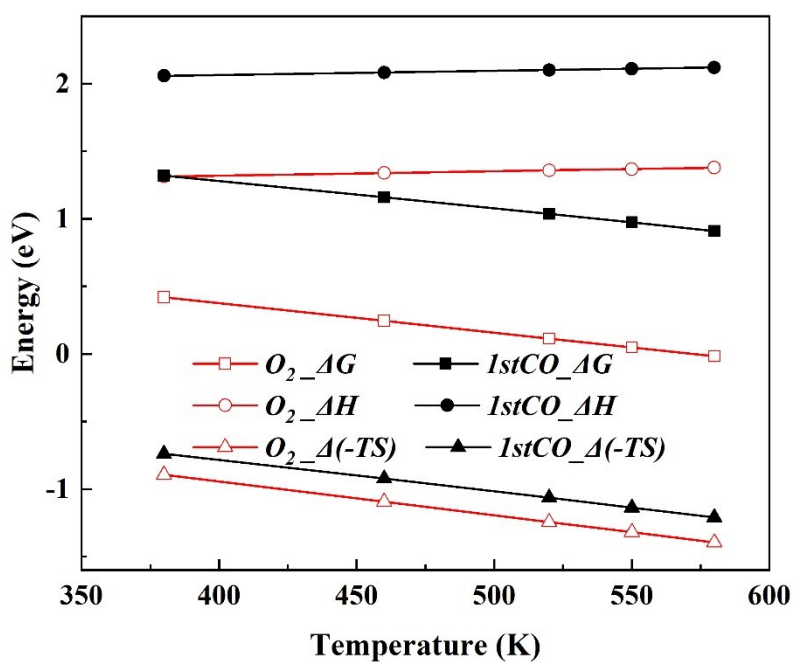

**Figure S8.** Variation of  $\Delta G$  and its enthalpy and entropy terms ( $\Delta H$ ,  $\Delta(-TS)$ ) for gas adsorption step on  $NiO_x/Pt_{(100)}$ . Red hollow symbol represents  $O_2$  adsorption on vacancy site, black solid symbol represents the first CO adsorption.

### 3. Further validation on the results

#### 3.1 The affection of Ni oxide stoichiometry on the results

As the oxygen vacancy formation energy ( $E_{ov}$ ) is closely related to the CO oxidation activity, we have calculated the  $E_{ov}$  in a larger  $Ni_{12}O_9$  cluster. The structure of optimized  $Ni_{12}O_9/Pt_{(100)}$  and the  $E_{ov}$  is shown in Figure S9. The calculated  $E_{ov}$  (1.47 eV) is a little smaller than that on  $Ni_5O_4/Pt_{(100)}$  (1.74 eV), which is still higher than that on  $NiO_x/Pt_{edge}$  (1.27 eV). The results shows that the stoichiometry would not change the main conclusion of the manuscript.

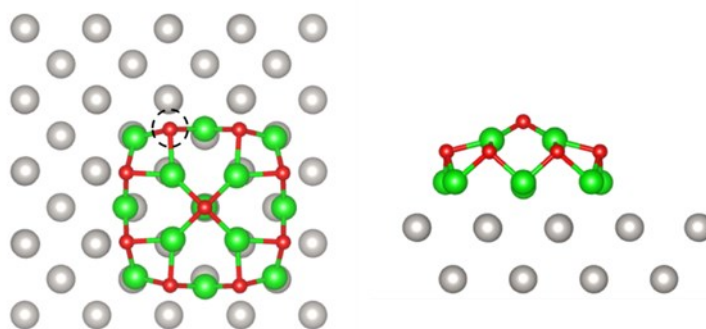

**Figure S9.** Top view (in the left) and side view (in the right) of  $Ni_{12}O_9$  cluster on  $Pt(100)$  surface. Pt, Ni, and O are represented by white, green, and red spheres, respectively. The circled oxygen in the top view is removed to evaluate the  $E_{ov}$  of  $Ni_{12}O_9$ .

#### 3.2 The imaginary mode of TSs

We also calculate the vibrational frequencies and modes to make sure to find the correct transition state with only one imaginary frequency. The single imaginary frequencies of TS1, TS2 and TS3 on  $Ni_5O_4/Pt(100)$  and  $NiO_2/Pt_{edge}$  are listed in Table S6 and those corresponding vibrational modes are shown in Figure S10.

**Table S6.** The imaginary frequency (in the unit of  $cm^{-1}$ ) of TS1, TS2 and TS3 on  $Ni_5O_4/Pt_{(100)}$  and  $NiO_2/Pt_{edge}$ .

|  | $Ni_5O_4/Pt_{(100)}$ | $NiO_2/Pt_{edge}$ |
|--|----------------------|-------------------|
|  |                      |                   |

|     |     |     |
|-----|-----|-----|
| TS1 | 440 | 246 |
| TS2 | 475 | 216 |
| TS3 | 344 | 377 |

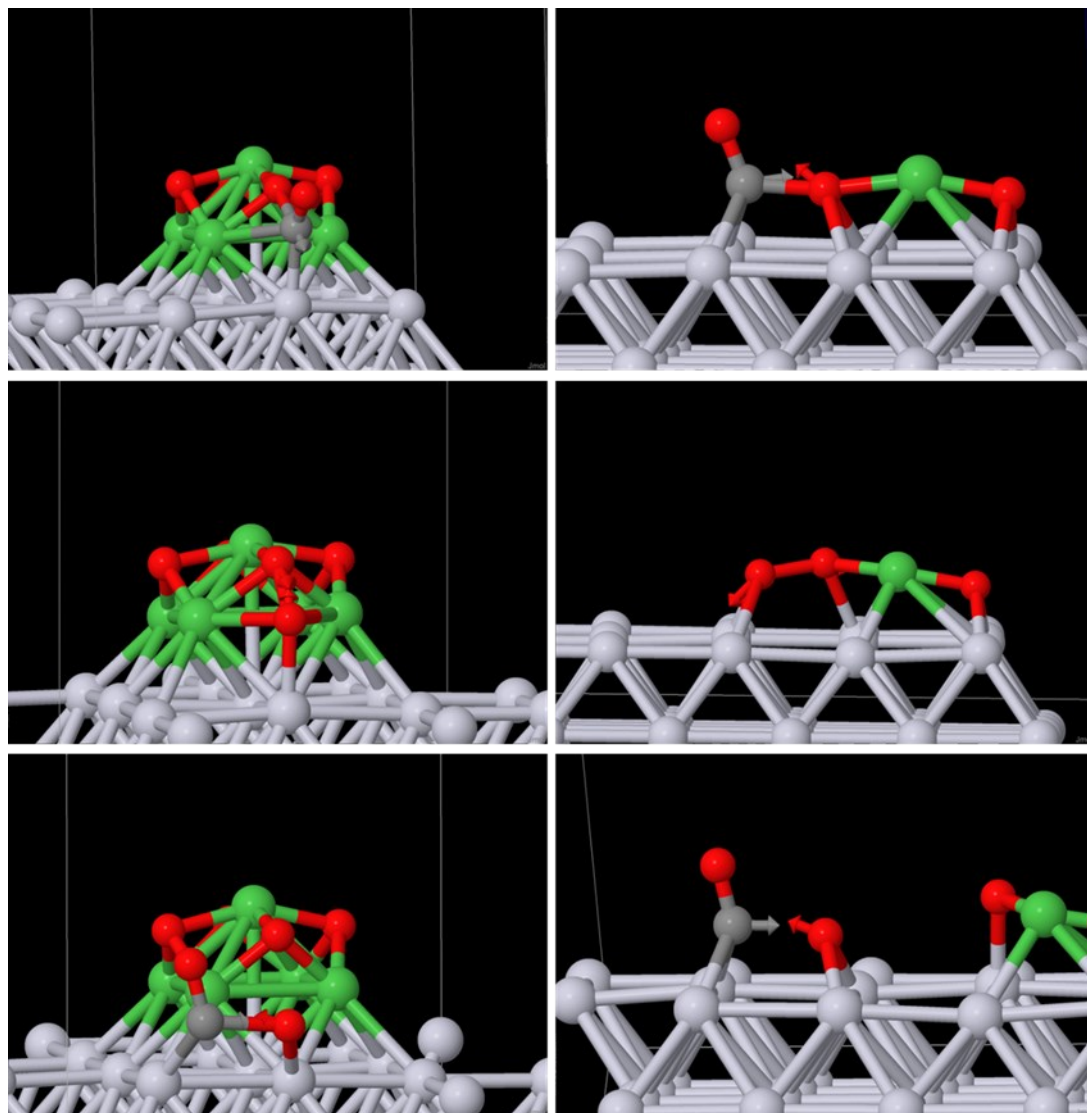

**Figure S10.** The direction of imaginary frequency of TS1-3 on Ni<sub>5</sub>O<sub>4</sub>/Pt<sub>(100)</sub> (the right region) and NiO<sub>2</sub>/Pt<sub>edge</sub> (the left region). Pt, Ni, O and C are represented by white, green, red and grey spheres, respectively.

---

#### 4. The coordinates of optimized structures and TSs

NiO<sub>x</sub>/Pt<sub>edge</sub>

\*

1.0

|               |               |               |
|---------------|---------------|---------------|
| 13.5928001404 | 0.0000000000  | 0.0000000000  |
| 0.0000000000  | 13.8731002808 | 0.0000000000  |
| 0.0000000000  | 0.0000000000  | 23.4076995850 |

|    |    |   |
|----|----|---|
| Pt | Ni | O |
| 80 | 1  | 2 |

Direct

|             |             |             |
|-------------|-------------|-------------|
| 0.166669995 | 0.000000000 | 0.000000000 |
| 0.333330005 | 0.000000000 | 0.136869997 |
| 0.000000000 | 0.000000000 | 0.068439998 |
| 0.158720002 | 0.001190000 | 0.209050000 |
| 0.333330005 | 0.100000001 | 0.034219999 |
| 0.000000000 | 0.100000001 | 0.171090007 |
| 0.166669995 | 0.100000001 | 0.102650002 |
| 0.323009998 | 0.100939997 | 0.242650002 |
| 0.666670024 | 0.000000000 | 0.000000000 |
| 0.832199991 | 0.999230027 | 0.146709993 |
| 0.488319993 | 0.997520030 | 0.270669997 |
| 0.500000000 | 0.000000000 | 0.068439998 |
| 0.663299978 | 0.997529984 | 0.206770003 |
| 0.833329976 | 0.100000001 | 0.034219999 |
| 0.500000000 | 0.100000001 | 0.171090007 |
| 0.666670024 | 0.100000001 | 0.102650002 |
| 0.166669995 | 0.200000003 | 0.000000000 |
| 0.333330005 | 0.200000003 | 0.136869997 |
| 0.000000000 | 0.200000003 | 0.068439998 |
| 0.159869999 | 0.199410006 | 0.209439993 |
| 0.333330005 | 0.300000012 | 0.034219999 |
| 0.000000000 | 0.300000012 | 0.171090007 |
| 0.166669995 | 0.300000012 | 0.102650002 |
| 0.320309997 | 0.298449993 | 0.242750004 |
| 0.666670024 | 0.200000003 | 0.000000000 |
| 0.835169971 | 0.199149996 | 0.144390002 |
| 0.484609991 | 0.197099999 | 0.276849985 |
| 0.500000000 | 0.200000003 | 0.068439998 |
| 0.671450019 | 0.197469994 | 0.205650002 |
| 0.833329976 | 0.300000012 | 0.034219999 |
| 0.500000000 | 0.300000012 | 0.171090007 |
| 0.666670024 | 0.300000012 | 0.102650002 |
| 0.166669995 | 0.400000006 | 0.000000000 |
| 0.333330005 | 0.400000006 | 0.136869997 |

---

|             |             |             |
|-------------|-------------|-------------|
| 0.000000000 | 0.400000006 | 0.068439998 |
| 0.158570006 | 0.400079995 | 0.208890006 |
| 0.333330005 | 0.500000000 | 0.034219999 |
| 0.000000000 | 0.500000000 | 0.171090007 |
| 0.166669995 | 0.500000000 | 0.102650002 |
| 0.318709999 | 0.501259983 | 0.242310002 |
| 0.666670024 | 0.400000006 | 0.000000000 |
| 0.835959971 | 0.400550008 | 0.142210007 |
| 0.479730010 | 0.404220015 | 0.270370007 |
| 0.500000000 | 0.400000006 | 0.068439998 |
| 0.681079984 | 0.405829996 | 0.208989993 |
| 0.833329976 | 0.500000000 | 0.034219999 |
| 0.500000000 | 0.500000000 | 0.171090007 |
| 0.666670024 | 0.500000000 | 0.102650002 |
| 0.166669995 | 0.600000024 | 0.000000000 |
| 0.333330005 | 0.600000024 | 0.136869997 |
| 0.000000000 | 0.600000024 | 0.068439998 |
| 0.158170000 | 0.601760030 | 0.208900005 |
| 0.333330005 | 0.699999988 | 0.034219999 |
| 0.000000000 | 0.699999988 | 0.171090007 |
| 0.166669995 | 0.699999988 | 0.102650002 |
| 0.320749998 | 0.701219976 | 0.242219999 |
| 0.666670024 | 0.600000024 | 0.000000000 |
| 0.832690001 | 0.600910008 | 0.146730006 |
| 0.487679988 | 0.601469994 | 0.270749986 |
| 0.500000000 | 0.600000024 | 0.068439998 |
| 0.663150012 | 0.602609992 | 0.206670001 |
| 0.833329976 | 0.699999988 | 0.034219999 |
| 0.500000000 | 0.699999988 | 0.171090007 |
| 0.666670024 | 0.699999988 | 0.102650002 |
| 0.166669995 | 0.800000012 | 0.000000000 |
| 0.333330005 | 0.800000012 | 0.136869997 |
| 0.000000000 | 0.800000012 | 0.068439998 |
| 0.158859998 | 0.802510023 | 0.209309995 |
| 0.333330005 | 0.899999976 | 0.034219999 |
| 0.000000000 | 0.899999976 | 0.171090007 |
| 0.166669995 | 0.899999976 | 0.102650002 |
| 0.321330011 | 0.900770009 | 0.242520005 |
| 0.666670024 | 0.800000012 | 0.000000000 |
| 0.831929982 | 0.800019979 | 0.147349998 |
| 0.489230007 | 0.799579978 | 0.270920008 |
| 0.500000000 | 0.800000012 | 0.068439998 |
| 0.663169980 | 0.800159991 | 0.208079994 |
| 0.833329976 | 0.899999976 | 0.034219999 |

---

|             |             |             |
|-------------|-------------|-------------|
| 0.500000000 | 0.899999976 | 0.171090007 |
| 0.666670024 | 0.899999976 | 0.102650002 |
| 0.621720016 | 0.319000006 | 0.310959995 |
| 0.712320030 | 0.396079987 | 0.289990008 |
| 0.636219978 | 0.198109999 | 0.290300012 |

CO\*

|    |    |   |   |
|----|----|---|---|
| Pt | Ni | O | C |
| 80 | 1  | 3 | 1 |

Direct

|             |             |             |
|-------------|-------------|-------------|
| 0.166669995 | 0.000000000 | 0.000000000 |
| 0.333330005 | 0.000000000 | 0.136869997 |
| 0.000000000 | 0.000000000 | 0.068439998 |
| 0.158720002 | 0.001190000 | 0.209050000 |
| 0.333330005 | 0.100000001 | 0.034219999 |
| 0.000000000 | 0.100000001 | 0.171090007 |
| 0.166669995 | 0.100000001 | 0.102650002 |
| 0.322620004 | 0.100979999 | 0.242550001 |
| 0.666670024 | 0.000000000 | 0.000000000 |
| 0.832759976 | 0.999140024 | 0.146559998 |
| 0.487819999 | 0.998149991 | 0.270619988 |
| 0.500000000 | 0.000000000 | 0.068439998 |
| 0.663439989 | 0.998250008 | 0.206499994 |
| 0.833329976 | 0.100000001 | 0.034219999 |
| 0.500000000 | 0.100000001 | 0.171090007 |
| 0.666670024 | 0.100000001 | 0.102650002 |
| 0.166669995 | 0.200000003 | 0.000000000 |
| 0.333330005 | 0.200000003 | 0.136869997 |
| 0.000000000 | 0.200000003 | 0.068439998 |
| 0.159869999 | 0.199410006 | 0.209439993 |
| 0.333330005 | 0.300000012 | 0.034219999 |
| 0.000000000 | 0.300000012 | 0.171090007 |
| 0.166669995 | 0.300000012 | 0.102650002 |
| 0.320089996 | 0.298860013 | 0.242709994 |
| 0.666670024 | 0.200000003 | 0.000000000 |
| 0.835569978 | 0.199359998 | 0.144329995 |
| 0.484030008 | 0.196620002 | 0.276840001 |
| 0.500000000 | 0.200000003 | 0.068439998 |
| 0.671459973 | 0.196919993 | 0.205459997 |
| 0.833329976 | 0.300000012 | 0.034219999 |
| 0.500000000 | 0.300000012 | 0.171090007 |
| 0.666670024 | 0.300000012 | 0.102650002 |
| 0.166669995 | 0.400000006 | 0.000000000 |
| 0.333330005 | 0.400000006 | 0.136869997 |

---

|             |             |             |
|-------------|-------------|-------------|
| 0.000000000 | 0.400000006 | 0.068439998 |
| 0.158570006 | 0.400079995 | 0.208890006 |
| 0.333330005 | 0.500000000 | 0.034219999 |
| 0.000000000 | 0.500000000 | 0.171090007 |
| 0.166669995 | 0.500000000 | 0.102650002 |
| 0.320580006 | 0.502080023 | 0.242190003 |
| 0.666670024 | 0.400000006 | 0.000000000 |
| 0.836080015 | 0.400510013 | 0.142210007 |
| 0.480170012 | 0.402260005 | 0.270319998 |
| 0.500000000 | 0.400000006 | 0.068439998 |
| 0.680800021 | 0.403389990 | 0.208629996 |
| 0.833329976 | 0.500000000 | 0.034219999 |
| 0.500000000 | 0.500000000 | 0.171090007 |
| 0.666670024 | 0.500000000 | 0.102650002 |
| 0.166669995 | 0.600000024 | 0.000000000 |
| 0.333330005 | 0.600000024 | 0.136869997 |
| 0.000000000 | 0.600000024 | 0.068439998 |
| 0.158170000 | 0.601760030 | 0.208900005 |
| 0.333330005 | 0.699999988 | 0.034219999 |
| 0.000000000 | 0.699999988 | 0.171090007 |
| 0.166669995 | 0.699999988 | 0.102650002 |
| 0.322459996 | 0.700370014 | 0.242009997 |
| 0.666670024 | 0.600000024 | 0.000000000 |
| 0.831809998 | 0.600849986 | 0.146880001 |
| 0.493460000 | 0.601450026 | 0.273229986 |
| 0.500000000 | 0.600000024 | 0.068439998 |
| 0.671429992 | 0.603290021 | 0.212060004 |
| 0.833329976 | 0.699999988 | 0.034219999 |
| 0.500000000 | 0.699999988 | 0.171090007 |
| 0.666670024 | 0.699999988 | 0.102650002 |
| 0.166669995 | 0.800000012 | 0.000000000 |
| 0.333330005 | 0.800000012 | 0.136869997 |
| 0.000000000 | 0.800000012 | 0.068439998 |
| 0.158859998 | 0.802510023 | 0.209309995 |
| 0.333330005 | 0.899999976 | 0.034219999 |
| 0.000000000 | 0.899999976 | 0.171090007 |
| 0.166669995 | 0.899999976 | 0.102650002 |
| 0.321009994 | 0.900200009 | 0.242420003 |
| 0.666670024 | 0.800000012 | 0.000000000 |
| 0.832260013 | 0.800029993 | 0.147049993 |
| 0.488979995 | 0.801739991 | 0.270779997 |
| 0.500000000 | 0.800000012 | 0.068439998 |
| 0.663399994 | 0.801630020 | 0.207139999 |
| 0.833329976 | 0.899999976 | 0.034219999 |



---

|             |             |             |
|-------------|-------------|-------------|
| 0.500000000 | 0.899999976 | 0.171090007 |
| 0.666670024 | 0.899999976 | 0.102650002 |
| 0.621919990 | 0.317330003 | 0.311529994 |
| 0.713670015 | 0.392140001 | 0.289279997 |
| 0.635999978 | 0.196919993 | 0.290109992 |
| 0.681580007 | 0.608240008 | 0.339540005 |
| 0.638050020 | 0.606119990 | 0.295920014 |

TS1

|    |    |   |   |
|----|----|---|---|
| Pt | Ni | O | C |
| 80 | 1  | 3 | 1 |

Direct

|             |             |             |
|-------------|-------------|-------------|
| 0.166669995 | 0.000000000 | 0.000000000 |
| 0.333330005 | 0.000000000 | 0.136869997 |
| 0.000000000 | 0.000000000 | 0.068439998 |
| 0.158720002 | 0.001190000 | 0.209050000 |
| 0.333330005 | 0.100000001 | 0.034219999 |
| 0.000000000 | 0.100000001 | 0.171090007 |
| 0.166669995 | 0.100000001 | 0.102650002 |
| 0.321559995 | 0.100599997 | 0.242510006 |
| 0.666670024 | 0.000000000 | 0.000000000 |
| 0.832870007 | 0.999239981 | 0.146779999 |
| 0.487560004 | 0.997409999 | 0.270449996 |
| 0.500000000 | 0.000000000 | 0.068439998 |
| 0.663469970 | 0.995989978 | 0.206499994 |
| 0.833329976 | 0.100000001 | 0.034219999 |
| 0.500000000 | 0.100000001 | 0.171090007 |
| 0.666670024 | 0.100000001 | 0.102650002 |
| 0.166669995 | 0.200000003 | 0.000000000 |
| 0.333330005 | 0.200000003 | 0.136869997 |
| 0.000000000 | 0.200000003 | 0.068439998 |
| 0.159869999 | 0.199410006 | 0.209439993 |
| 0.333330005 | 0.300000012 | 0.034219999 |
| 0.000000000 | 0.300000012 | 0.171090007 |
| 0.166669995 | 0.300000012 | 0.102650002 |
| 0.325179994 | 0.301629990 | 0.243149996 |
| 0.666670024 | 0.200000003 | 0.000000000 |
| 0.835200012 | 0.199479997 | 0.144679993 |
| 0.482069999 | 0.197209999 | 0.275940001 |
| 0.500000000 | 0.200000003 | 0.068439998 |
| 0.673160017 | 0.193529993 | 0.207599998 |
| 0.833329976 | 0.300000012 | 0.034219999 |
| 0.500000000 | 0.300000012 | 0.171090007 |
| 0.666670024 | 0.300000012 | 0.102650002 |

---

|             |             |             |
|-------------|-------------|-------------|
| 0.166669995 | 0.400000006 | 0.000000000 |
| 0.333330005 | 0.400000006 | 0.136869997 |
| 0.000000000 | 0.400000006 | 0.068439998 |
| 0.158570006 | 0.400079995 | 0.208890006 |
| 0.333330005 | 0.500000000 | 0.034219999 |
| 0.000000000 | 0.500000000 | 0.171090007 |
| 0.166669995 | 0.500000000 | 0.102650002 |
| 0.321810007 | 0.500919998 | 0.242229998 |
| 0.666670024 | 0.400000006 | 0.000000000 |
| 0.835990012 | 0.401149988 | 0.143619999 |
| 0.487060010 | 0.403259993 | 0.273380011 |
| 0.500000000 | 0.400000006 | 0.068439998 |
| 0.673089981 | 0.398200005 | 0.205789998 |
| 0.833329976 | 0.500000000 | 0.034219999 |
| 0.500000000 | 0.500000000 | 0.171090007 |
| 0.666670024 | 0.500000000 | 0.102650002 |
| 0.166669995 | 0.600000024 | 0.000000000 |
| 0.333330005 | 0.600000024 | 0.136869997 |
| 0.000000000 | 0.600000024 | 0.068439998 |
| 0.158170000 | 0.601760030 | 0.208900005 |
| 0.333330005 | 0.699999988 | 0.034219999 |
| 0.000000000 | 0.699999988 | 0.171090007 |
| 0.166669995 | 0.699999988 | 0.102650002 |
| 0.324440002 | 0.698629975 | 0.242489994 |
| 0.666670024 | 0.600000024 | 0.000000000 |
| 0.831409991 | 0.600759983 | 0.150110006 |
| 0.499029994 | 0.603299975 | 0.271910012 |
| 0.500000000 | 0.600000024 | 0.068439998 |
| 0.667900026 | 0.600179970 | 0.208969995 |
| 0.833329976 | 0.699999988 | 0.034219999 |
| 0.500000000 | 0.699999988 | 0.171090007 |
| 0.666670024 | 0.699999988 | 0.102650002 |
| 0.166669995 | 0.800000012 | 0.000000000 |
| 0.333330005 | 0.800000012 | 0.136869997 |
| 0.000000000 | 0.800000012 | 0.068439998 |
| 0.158859998 | 0.802510023 | 0.209309995 |
| 0.333330005 | 0.899999976 | 0.034219999 |
| 0.000000000 | 0.899999976 | 0.171090007 |
| 0.166669995 | 0.899999976 | 0.102650002 |
| 0.320919991 | 0.899299979 | 0.242349997 |
| 0.666670024 | 0.800000012 | 0.000000000 |
| 0.832180023 | 0.799860001 | 0.146980003 |
| 0.489840001 | 0.801599979 | 0.271250010 |
| 0.500000000 | 0.800000012 | 0.068439998 |

---

|             |             |             |
|-------------|-------------|-------------|
| 0.663789988 | 0.798969984 | 0.207369998 |
| 0.833329976 | 0.899999976 | 0.034219999 |
| 0.500000000 | 0.899999976 | 0.171090007 |
| 0.666670024 | 0.899999976 | 0.102650002 |
| 0.643869996 | 0.312550008 | 0.302500010 |
| 0.640910029 | 0.446559995 | 0.292109996 |
| 0.630389988 | 0.188759997 | 0.291839987 |
| 0.688160002 | 0.591229975 | 0.337029994 |
| 0.646459997 | 0.558830023 | 0.295870006 |

O<sub>Van</sub>

| Pt | Ni | O |
|----|----|---|
| 80 | 1  | 1 |

Direct

|             |             |             |
|-------------|-------------|-------------|
| 0.166669995 | 0.000000000 | 0.000000000 |
| 0.333330005 | 0.000000000 | 0.136869997 |
| 0.000000000 | 0.000000000 | 0.068439998 |
| 0.158720002 | 0.001190000 | 0.209050000 |
| 0.333330005 | 0.100000001 | 0.034219999 |
| 0.000000000 | 0.100000001 | 0.171090007 |
| 0.166669995 | 0.100000001 | 0.102650002 |
| 0.323359996 | 0.101000004 | 0.242569998 |
| 0.666670024 | 0.000000000 | 0.000000000 |
| 0.832379997 | 0.999270022 | 0.146760002 |
| 0.488499999 | 0.997500002 | 0.270619988 |
| 0.500000000 | 0.000000000 | 0.068439998 |
| 0.663420022 | 0.996980011 | 0.206829995 |
| 0.833329976 | 0.100000001 | 0.034219999 |
| 0.500000000 | 0.100000001 | 0.171090007 |
| 0.666670024 | 0.100000001 | 0.102650002 |
| 0.166669995 | 0.200000003 | 0.000000000 |
| 0.333330005 | 0.200000003 | 0.136869997 |
| 0.000000000 | 0.200000003 | 0.068439998 |
| 0.159869999 | 0.199410006 | 0.209439993 |
| 0.333330005 | 0.300000012 | 0.034219999 |
| 0.000000000 | 0.300000012 | 0.171090007 |
| 0.166669995 | 0.300000012 | 0.102650002 |
| 0.322670013 | 0.298759997 | 0.242760003 |
| 0.666670024 | 0.200000003 | 0.000000000 |
| 0.835020006 | 0.199699998 | 0.144250005 |
| 0.485329986 | 0.197119996 | 0.275880009 |
| 0.500000000 | 0.200000003 | 0.068439998 |
| 0.674799979 | 0.194869995 | 0.207599998 |
| 0.833329976 | 0.300000012 | 0.034219999 |

---

|             |             |             |
|-------------|-------------|-------------|
| 0.500000000 | 0.300000012 | 0.171090007 |
| 0.666670024 | 0.300000012 | 0.102650002 |
| 0.166669995 | 0.400000006 | 0.000000000 |
| 0.333330005 | 0.400000006 | 0.136869997 |
| 0.000000000 | 0.400000006 | 0.068439998 |
| 0.158570006 | 0.400079995 | 0.208890006 |
| 0.333330005 | 0.500000000 | 0.034219999 |
| 0.000000000 | 0.500000000 | 0.171090007 |
| 0.166669995 | 0.500000000 | 0.102650002 |
| 0.320809990 | 0.500270009 | 0.242029995 |
| 0.666670024 | 0.400000006 | 0.000000000 |
| 0.833209991 | 0.400269985 | 0.146290004 |
| 0.485560000 | 0.404350013 | 0.270990014 |
| 0.500000000 | 0.400000006 | 0.068439998 |
| 0.666419983 | 0.402770013 | 0.206430003 |
| 0.833329976 | 0.500000000 | 0.034219999 |
| 0.500000000 | 0.500000000 | 0.171090007 |
| 0.666670024 | 0.500000000 | 0.102650002 |
| 0.166669995 | 0.600000024 | 0.000000000 |
| 0.333330005 | 0.600000024 | 0.136869997 |
| 0.000000000 | 0.600000024 | 0.068439998 |
| 0.158170000 | 0.601760030 | 0.208900005 |
| 0.333330005 | 0.699999988 | 0.034219999 |
| 0.000000000 | 0.699999988 | 0.171090007 |
| 0.166669995 | 0.699999988 | 0.102650002 |
| 0.321599990 | 0.700640023 | 0.242090002 |
| 0.666670024 | 0.600000024 | 0.000000000 |
| 0.832050025 | 0.600040019 | 0.147110000 |
| 0.488909990 | 0.601530015 | 0.270969987 |
| 0.500000000 | 0.600000024 | 0.068439998 |
| 0.663469970 | 0.600740016 | 0.207829997 |
| 0.833329976 | 0.699999988 | 0.034219999 |
| 0.500000000 | 0.699999988 | 0.171090007 |
| 0.666670024 | 0.699999988 | 0.102650002 |
| 0.166669995 | 0.800000012 | 0.000000000 |
| 0.333330005 | 0.800000012 | 0.136869997 |
| 0.000000000 | 0.800000012 | 0.068439998 |
| 0.158859998 | 0.802510023 | 0.209309995 |
| 0.333330005 | 0.899999976 | 0.034219999 |
| 0.000000000 | 0.899999976 | 0.171090007 |
| 0.166669995 | 0.899999976 | 0.102650002 |
| 0.321530014 | 0.900579989 | 0.242459998 |
| 0.666670024 | 0.800000012 | 0.000000000 |
| 0.832099974 | 0.799920022 | 0.147180006 |

---

|             |             |             |
|-------------|-------------|-------------|
| 0.489620000 | 0.799499989 | 0.270909995 |
| 0.500000000 | 0.800000012 | 0.068439998 |
| 0.663410008 | 0.799120009 | 0.207790002 |
| 0.833329976 | 0.899999976 | 0.034219999 |
| 0.500000000 | 0.899999976 | 0.171090007 |
| 0.666670024 | 0.899999976 | 0.102650002 |
| 0.640169978 | 0.325960010 | 0.301290005 |
| 0.635280013 | 0.201639995 | 0.291619986 |

O#

|    |    |   |
|----|----|---|
| Pt | Ni | O |
| 80 | 1  | 3 |

Direct

|             |             |             |
|-------------|-------------|-------------|
| 0.166669995 | 0.000000000 | 0.000000000 |
| 0.333330005 | 0.000000000 | 0.136869997 |
| 0.000000000 | 0.000000000 | 0.068439998 |
| 0.158720002 | 0.001190000 | 0.209050000 |
| 0.333330005 | 0.100000001 | 0.034219999 |
| 0.000000000 | 0.100000001 | 0.171090007 |
| 0.166669995 | 0.100000001 | 0.102650002 |
| 0.322910011 | 0.101039998 | 0.242430001 |
| 0.666670024 | 0.000000000 | 0.000000000 |
| 0.832000017 | 0.999530017 | 0.146709993 |
| 0.487879992 | 0.998420000 | 0.270649999 |
| 0.500000000 | 0.000000000 | 0.068439998 |
| 0.662670016 | 0.997950017 | 0.206939995 |
| 0.833329976 | 0.100000001 | 0.034219999 |
| 0.500000000 | 0.100000001 | 0.171090007 |
| 0.666670024 | 0.100000001 | 0.102650002 |
| 0.166669995 | 0.200000003 | 0.000000000 |
| 0.333330005 | 0.200000003 | 0.136869997 |
| 0.000000000 | 0.200000003 | 0.068439998 |
| 0.159869999 | 0.199410006 | 0.209439993 |
| 0.333330005 | 0.300000012 | 0.034219999 |
| 0.000000000 | 0.300000012 | 0.171090007 |
| 0.166669995 | 0.300000012 | 0.102650002 |
| 0.319860011 | 0.298709989 | 0.243080005 |
| 0.666670024 | 0.200000003 | 0.000000000 |
| 0.834050000 | 0.199120000 | 0.145730004 |
| 0.481350005 | 0.198220000 | 0.275990009 |
| 0.500000000 | 0.200000003 | 0.068439998 |
| 0.672089994 | 0.193269998 | 0.209700003 |
| 0.833329976 | 0.300000012 | 0.034219999 |
| 0.500000000 | 0.300000012 | 0.171090007 |

---

|             |             |             |
|-------------|-------------|-------------|
| 0.666670024 | 0.300000012 | 0.102650002 |
| 0.166669995 | 0.400000006 | 0.000000000 |
| 0.333330005 | 0.400000006 | 0.136869997 |
| 0.000000000 | 0.400000006 | 0.068439998 |
| 0.158570006 | 0.400079995 | 0.208890006 |
| 0.333330005 | 0.500000000 | 0.034219999 |
| 0.000000000 | 0.500000000 | 0.171090007 |
| 0.166669995 | 0.500000000 | 0.102650002 |
| 0.319429994 | 0.500020027 | 0.242090002 |
| 0.666670024 | 0.400000006 | 0.000000000 |
| 0.837360024 | 0.399980009 | 0.141530007 |
| 0.483170003 | 0.400720000 | 0.270550013 |
| 0.500000000 | 0.400000006 | 0.068439998 |
| 0.674950004 | 0.395529985 | 0.202509999 |
| 0.833329976 | 0.500000000 | 0.034219999 |
| 0.500000000 | 0.500000000 | 0.171090007 |
| 0.666670024 | 0.500000000 | 0.102650002 |
| 0.166669995 | 0.600000024 | 0.000000000 |
| 0.333330005 | 0.600000024 | 0.136869997 |
| 0.000000000 | 0.600000024 | 0.068439998 |
| 0.158170000 | 0.601760030 | 0.208900005 |
| 0.333330005 | 0.699999988 | 0.034219999 |
| 0.000000000 | 0.699999988 | 0.171090007 |
| 0.166669995 | 0.699999988 | 0.102650002 |
| 0.320069999 | 0.701089978 | 0.242139995 |
| 0.666670024 | 0.600000024 | 0.000000000 |
| 0.833039999 | 0.600870013 | 0.144859999 |
| 0.483929992 | 0.600790024 | 0.270779997 |
| 0.500000000 | 0.600000024 | 0.068439998 |
| 0.669459999 | 0.606209993 | 0.209869996 |
| 0.833329976 | 0.699999988 | 0.034219999 |
| 0.500000000 | 0.699999988 | 0.171090007 |
| 0.666670024 | 0.699999988 | 0.102650002 |
| 0.166669995 | 0.800000012 | 0.000000000 |
| 0.333330005 | 0.800000012 | 0.136869997 |
| 0.000000000 | 0.800000012 | 0.068439998 |
| 0.158859998 | 0.802510023 | 0.209309995 |
| 0.333330005 | 0.899999976 | 0.034219999 |
| 0.000000000 | 0.899999976 | 0.171090007 |
| 0.166669995 | 0.899999976 | 0.102650002 |
| 0.321159989 | 0.900820017 | 0.242530003 |
| 0.666670024 | 0.800000012 | 0.000000000 |
| 0.832759976 | 0.800710022 | 0.147060007 |
| 0.488660008 | 0.799790025 | 0.270790011 |

---

|             |             |             |
|-------------|-------------|-------------|
| 0.500000000 | 0.800000012 | 0.068439998 |
| 0.663500011 | 0.801810026 | 0.207509995 |
| 0.833329976 | 0.899999976 | 0.034219999 |
| 0.500000000 | 0.899999976 | 0.171090007 |
| 0.666670024 | 0.899999976 | 0.102650002 |
| 0.652610004 | 0.335990012 | 0.300269991 |
| 0.627669990 | 0.210170001 | 0.294140011 |
| 0.701529980 | 0.550090015 | 0.287129998 |
| 0.720120013 | 0.447829992 | 0.282359987 |

TS2

Pt Ni O  
80 1 3

Direct

|             |             |             |
|-------------|-------------|-------------|
| 0.166669995 | 0.000000000 | 0.000000000 |
| 0.333330005 | 0.000000000 | 0.136869997 |
| 0.000000000 | 0.000000000 | 0.068439998 |
| 0.158720002 | 0.001190000 | 0.209050000 |
| 0.333330005 | 0.100000001 | 0.034219999 |
| 0.000000000 | 0.100000001 | 0.171090007 |
| 0.166669995 | 0.100000001 | 0.102650002 |
| 0.322809994 | 0.101109996 | 0.242510006 |
| 0.666670024 | 0.000000000 | 0.000000000 |
| 0.832390010 | 0.999419987 | 0.146469995 |
| 0.487819999 | 0.998399973 | 0.270570010 |
| 0.500000000 | 0.000000000 | 0.068439998 |
| 0.662959993 | 0.998399973 | 0.206609994 |
| 0.833329976 | 0.100000001 | 0.034219999 |
| 0.500000000 | 0.100000001 | 0.171090007 |
| 0.666670024 | 0.100000001 | 0.102650002 |
| 0.166669995 | 0.200000003 | 0.000000000 |
| 0.333330005 | 0.200000003 | 0.136869997 |
| 0.000000000 | 0.200000003 | 0.068439998 |
| 0.159869999 | 0.199410006 | 0.209439993 |
| 0.333330005 | 0.300000012 | 0.034219999 |
| 0.000000000 | 0.300000012 | 0.171090007 |
| 0.166669995 | 0.300000012 | 0.102650002 |
| 0.319770008 | 0.298779994 | 0.242880002 |
| 0.666670024 | 0.200000003 | 0.000000000 |
| 0.834720016 | 0.199159995 | 0.145050004 |
| 0.482919991 | 0.197310001 | 0.276309997 |
| 0.500000000 | 0.200000003 | 0.068439998 |
| 0.671899974 | 0.195319995 | 0.207760006 |
| 0.833329976 | 0.300000012 | 0.034219999 |

---

|             |             |             |
|-------------|-------------|-------------|
| 0.500000000 | 0.300000012 | 0.171090007 |
| 0.666670024 | 0.300000012 | 0.102650002 |
| 0.166669995 | 0.400000006 | 0.000000000 |
| 0.333330005 | 0.400000006 | 0.136869997 |
| 0.000000000 | 0.400000006 | 0.068439998 |
| 0.158570006 | 0.400079995 | 0.208890006 |
| 0.333330005 | 0.500000000 | 0.034219999 |
| 0.000000000 | 0.500000000 | 0.171090007 |
| 0.166669995 | 0.500000000 | 0.102650002 |
| 0.319889992 | 0.501519978 | 0.242359996 |
| 0.666670024 | 0.400000006 | 0.000000000 |
| 0.836860001 | 0.399949998 | 0.141739994 |
| 0.481169999 | 0.401140004 | 0.270260006 |
| 0.500000000 | 0.400000006 | 0.068439998 |
| 0.677540004 | 0.398900002 | 0.205090001 |
| 0.833329976 | 0.500000000 | 0.034219999 |
| 0.500000000 | 0.500000000 | 0.171090007 |
| 0.666670024 | 0.500000000 | 0.102650002 |
| 0.166669995 | 0.600000024 | 0.000000000 |
| 0.333330005 | 0.600000024 | 0.136869997 |
| 0.000000000 | 0.600000024 | 0.068439998 |
| 0.158170000 | 0.601760030 | 0.208900005 |
| 0.333330005 | 0.699999988 | 0.034219999 |
| 0.000000000 | 0.699999988 | 0.171090007 |
| 0.166669995 | 0.699999988 | 0.102650002 |
| 0.321159989 | 0.700469971 | 0.242459998 |
| 0.666670024 | 0.600000024 | 0.000000000 |
| 0.833980024 | 0.600830019 | 0.144700006 |
| 0.483850002 | 0.600880027 | 0.273079991 |
| 0.500000000 | 0.600000024 | 0.068439998 |
| 0.670690000 | 0.604910016 | 0.208409995 |
| 0.833329976 | 0.699999988 | 0.034219999 |
| 0.500000000 | 0.699999988 | 0.171090007 |
| 0.666670024 | 0.699999988 | 0.102650002 |
| 0.166669995 | 0.800000012 | 0.000000000 |
| 0.333330005 | 0.800000012 | 0.136869997 |
| 0.000000000 | 0.800000012 | 0.068439998 |
| 0.158859998 | 0.802510023 | 0.209309995 |
| 0.333330005 | 0.899999976 | 0.034219999 |
| 0.000000000 | 0.899999976 | 0.171090007 |
| 0.166669995 | 0.899999976 | 0.102650002 |
| 0.320829988 | 0.900629997 | 0.242440000 |
| 0.666670024 | 0.800000012 | 0.000000000 |
| 0.833000004 | 0.800599992 | 0.146599993 |



---

|             |             |             |
|-------------|-------------|-------------|
| 0.488180012 | 0.801100016 | 0.270529985 |
| 0.500000000 | 0.800000012 | 0.068439998 |
| 0.663659990 | 0.802150011 | 0.206780002 |
| 0.833329976 | 0.899999976 | 0.034219999 |
| 0.500000000 | 0.899999976 | 0.171090007 |
| 0.666670024 | 0.899999976 | 0.102650002 |
| 0.646399975 | 0.336239994 | 0.301560014 |
| 0.629880011 | 0.209800005 | 0.292890012 |
| 0.660529971 | 0.557269990 | 0.289590001 |
| 0.701370001 | 0.453999996 | 0.287919998 |

O\*

|    |    |   |
|----|----|---|
| Pt | Ni | O |
| 80 | 1  | 3 |

Direct

|             |             |             |
|-------------|-------------|-------------|
| 0.166669995 | 0.000000000 | 0.000000000 |
| 0.333330005 | 0.000000000 | 0.136869997 |
| 0.000000000 | 0.000000000 | 0.068439998 |
| 0.158720002 | 0.001190000 | 0.209050000 |
| 0.333330005 | 0.100000001 | 0.034219999 |
| 0.000000000 | 0.100000001 | 0.171090007 |
| 0.166669995 | 0.100000001 | 0.102650002 |
| 0.322710007 | 0.101180002 | 0.242599994 |
| 0.666670024 | 0.000000000 | 0.000000000 |
| 0.832780004 | 0.999319971 | 0.146239996 |
| 0.487760007 | 0.998390019 | 0.270489991 |
| 0.500000000 | 0.000000000 | 0.068439998 |
| 0.663250029 | 0.998839974 | 0.206290007 |
| 0.833329976 | 0.100000001 | 0.034219999 |
| 0.500000000 | 0.100000001 | 0.171090007 |
| 0.666670024 | 0.100000001 | 0.102650002 |
| 0.166669995 | 0.200000003 | 0.000000000 |
| 0.333330005 | 0.200000003 | 0.136869997 |
| 0.000000000 | 0.200000003 | 0.068439998 |
| 0.159869999 | 0.199410006 | 0.209439993 |
| 0.333330005 | 0.300000012 | 0.034219999 |
| 0.000000000 | 0.300000012 | 0.171090007 |
| 0.166669995 | 0.300000012 | 0.102650002 |
| 0.319680005 | 0.298850000 | 0.242689997 |
| 0.666670024 | 0.200000003 | 0.000000000 |
| 0.835399985 | 0.199210003 | 0.144370005 |
| 0.484479994 | 0.196410000 | 0.276639998 |
| 0.500000000 | 0.200000003 | 0.068439998 |
| 0.671700001 | 0.197359994 | 0.205809996 |

---

|             |             |             |
|-------------|-------------|-------------|
| 0.833329976 | 0.300000012 | 0.034219999 |
| 0.500000000 | 0.300000012 | 0.171090007 |
| 0.666670024 | 0.300000012 | 0.102650002 |
| 0.166669995 | 0.400000006 | 0.000000000 |
| 0.333330005 | 0.400000006 | 0.136869997 |
| 0.000000000 | 0.400000006 | 0.068439998 |
| 0.158570006 | 0.400079995 | 0.208890006 |
| 0.333330005 | 0.500000000 | 0.034219999 |
| 0.000000000 | 0.500000000 | 0.171090007 |
| 0.166669995 | 0.500000000 | 0.102650002 |
| 0.320360005 | 0.503019989 | 0.242630005 |
| 0.666670024 | 0.400000006 | 0.000000000 |
| 0.836369991 | 0.399910003 | 0.141949996 |
| 0.479180008 | 0.401560009 | 0.269980013 |
| 0.500000000 | 0.400000006 | 0.068439998 |
| 0.680130005 | 0.402269989 | 0.207670003 |
| 0.833329976 | 0.500000000 | 0.034219999 |
| 0.500000000 | 0.500000000 | 0.171090007 |
| 0.666670024 | 0.500000000 | 0.102650002 |
| 0.166669995 | 0.600000024 | 0.000000000 |
| 0.333330005 | 0.600000024 | 0.136869997 |
| 0.000000000 | 0.600000024 | 0.068439998 |
| 0.158170000 | 0.601760030 | 0.208900005 |
| 0.333330005 | 0.699999988 | 0.034219999 |
| 0.000000000 | 0.699999988 | 0.171090007 |
| 0.166669995 | 0.699999988 | 0.102650002 |
| 0.322250009 | 0.699859977 | 0.242780000 |
| 0.666670024 | 0.600000024 | 0.000000000 |
| 0.834919989 | 0.600790024 | 0.144539997 |
| 0.483770013 | 0.600969970 | 0.275389999 |
| 0.500000000 | 0.600000024 | 0.068439998 |
| 0.671920002 | 0.603609979 | 0.206949994 |
| 0.833329976 | 0.699999988 | 0.034219999 |
| 0.500000000 | 0.699999988 | 0.171090007 |
| 0.666670024 | 0.699999988 | 0.102650002 |
| 0.166669995 | 0.800000012 | 0.000000000 |
| 0.333330005 | 0.800000012 | 0.136869997 |
| 0.000000000 | 0.800000012 | 0.068439998 |
| 0.158859998 | 0.802510023 | 0.209309995 |
| 0.333330005 | 0.899999976 | 0.034219999 |
| 0.000000000 | 0.899999976 | 0.171090007 |
| 0.166669995 | 0.899999976 | 0.102650002 |
| 0.320490003 | 0.900430024 | 0.242359996 |
| 0.666670024 | 0.800000012 | 0.000000000 |

---

|             |             |             |
|-------------|-------------|-------------|
| 0.833230019 | 0.800490022 | 0.146139994 |
| 0.487699986 | 0.802399993 | 0.270260006 |
| 0.500000000 | 0.800000012 | 0.068439998 |
| 0.663810015 | 0.802489996 | 0.206049994 |
| 0.833329976 | 0.899999976 | 0.034219999 |
| 0.500000000 | 0.899999976 | 0.171090007 |
| 0.666670024 | 0.899999976 | 0.102650002 |
| 0.621829987 | 0.318190008 | 0.311800003 |
| 0.636520028 | 0.197579995 | 0.290410012 |
| 0.626089990 | 0.604279995 | 0.286190003 |
| 0.712419987 | 0.393029988 | 0.288370013 |

CO~O\*

| Pt | Ni | O | C |
|----|----|---|---|
| 80 | 1  | 4 | 1 |

Direct

|             |             |             |
|-------------|-------------|-------------|
| 0.166669995 | 0.000000000 | 0.000000000 |
| 0.333330005 | 0.000000000 | 0.136869997 |
| 0.000000000 | 0.000000000 | 0.068439998 |
| 0.158720002 | 0.001190000 | 0.209050000 |
| 0.333330005 | 0.100000001 | 0.034219999 |
| 0.000000000 | 0.100000001 | 0.171090007 |
| 0.166669995 | 0.100000001 | 0.102650002 |
| 0.322340012 | 0.100539997 | 0.242520005 |
| 0.666670024 | 0.000000000 | 0.000000000 |
| 0.832769990 | 0.999260008 | 0.146589994 |
| 0.487480015 | 0.000320000 | 0.270449996 |
| 0.500000000 | 0.000000000 | 0.068439998 |
| 0.663309991 | 0.999700010 | 0.205789998 |
| 0.833329976 | 0.100000001 | 0.034219999 |
| 0.500000000 | 0.100000001 | 0.171090007 |
| 0.666670024 | 0.100000001 | 0.102650002 |
| 0.166669995 | 0.200000003 | 0.000000000 |
| 0.333330005 | 0.200000003 | 0.136869997 |
| 0.000000000 | 0.200000003 | 0.068439998 |
| 0.159869999 | 0.199410006 | 0.209439993 |
| 0.333330005 | 0.300000012 | 0.034219999 |
| 0.000000000 | 0.300000012 | 0.171090007 |
| 0.166669995 | 0.300000012 | 0.102650002 |
| 0.319270015 | 0.298619986 | 0.242630005 |
| 0.666670024 | 0.200000003 | 0.000000000 |
| 0.835640013 | 0.199000001 | 0.144400001 |
| 0.483539999 | 0.197369993 | 0.276870012 |
| 0.500000000 | 0.200000003 | 0.068439998 |

---

|             |             |             |
|-------------|-------------|-------------|
| 0.671570003 | 0.197469994 | 0.205870003 |
| 0.833329976 | 0.300000012 | 0.034219999 |
| 0.500000000 | 0.300000012 | 0.171090007 |
| 0.666670024 | 0.300000012 | 0.102650002 |
| 0.166669995 | 0.400000006 | 0.000000000 |
| 0.333330005 | 0.400000006 | 0.136869997 |
| 0.000000000 | 0.400000006 | 0.068439998 |
| 0.158570006 | 0.400079995 | 0.208890006 |
| 0.333330005 | 0.500000000 | 0.034219999 |
| 0.000000000 | 0.500000000 | 0.171090007 |
| 0.166669995 | 0.500000000 | 0.102650002 |
| 0.319770008 | 0.503570020 | 0.242599994 |
| 0.666670024 | 0.400000006 | 0.000000000 |
| 0.836780012 | 0.400119990 | 0.141800001 |
| 0.478210002 | 0.401179999 | 0.270139992 |
| 0.500000000 | 0.400000006 | 0.068439998 |
| 0.681119978 | 0.400959998 | 0.207719997 |
| 0.833329976 | 0.500000000 | 0.034219999 |
| 0.500000000 | 0.500000000 | 0.171090007 |
| 0.666670024 | 0.500000000 | 0.102650002 |
| 0.166669995 | 0.600000024 | 0.000000000 |
| 0.333330005 | 0.600000024 | 0.136869997 |
| 0.000000000 | 0.600000024 | 0.068439998 |
| 0.158170000 | 0.601760030 | 0.208900005 |
| 0.333330005 | 0.699999988 | 0.034219999 |
| 0.000000000 | 0.699999988 | 0.171090007 |
| 0.166669995 | 0.699999988 | 0.102650002 |
| 0.323659986 | 0.700869977 | 0.242599994 |
| 0.666670024 | 0.600000024 | 0.000000000 |
| 0.834850013 | 0.600839972 | 0.144749999 |
| 0.482919991 | 0.599529982 | 0.275389999 |
| 0.500000000 | 0.600000024 | 0.068439998 |
| 0.671060026 | 0.601490021 | 0.206279993 |
| 0.833329976 | 0.699999988 | 0.034219999 |
| 0.500000000 | 0.699999988 | 0.171090007 |
| 0.666670024 | 0.699999988 | 0.102650002 |
| 0.166669995 | 0.800000012 | 0.000000000 |
| 0.333330005 | 0.800000012 | 0.136869997 |
| 0.000000000 | 0.800000012 | 0.068439998 |
| 0.158859998 | 0.802510023 | 0.209309995 |
| 0.333330005 | 0.899999976 | 0.034219999 |
| 0.000000000 | 0.899999976 | 0.171090007 |
| 0.166669995 | 0.899999976 | 0.102650002 |
| 0.322149992 | 0.899739981 | 0.242369995 |

---

|             |             |             |
|-------------|-------------|-------------|
| 0.666670024 | 0.800000012 | 0.000000000 |
| 0.831979990 | 0.800570011 | 0.146640003 |
| 0.493880004 | 0.802370012 | 0.272859991 |
| 0.500000000 | 0.800000012 | 0.068439998 |
| 0.671800017 | 0.802309990 | 0.211870000 |
| 0.833329976 | 0.899999976 | 0.034219999 |
| 0.500000000 | 0.899999976 | 0.171090007 |
| 0.666670024 | 0.899999976 | 0.102650002 |
| 0.621450007 | 0.318349987 | 0.311830014 |
| 0.635559976 | 0.197699994 | 0.290399998 |
| 0.625389993 | 0.597700000 | 0.285569996 |
| 0.712559998 | 0.392630011 | 0.288509995 |
| 0.682359993 | 0.808279991 | 0.339430004 |
| 0.639479995 | 0.805899978 | 0.295599997 |

TS3

| Pt | Ni | O | C |
|----|----|---|---|
| 80 | 1  | 4 | 1 |

Direct

|             |             |             |
|-------------|-------------|-------------|
| 0.166669995 | 0.000000000 | 0.000000000 |
| 0.333330005 | 0.000000000 | 0.136869997 |
| 0.000000000 | 0.000000000 | 0.068439998 |
| 0.158720002 | 0.001190000 | 0.209050000 |
| 0.333330005 | 0.100000001 | 0.034219999 |
| 0.000000000 | 0.100000001 | 0.171090007 |
| 0.166669995 | 0.100000001 | 0.102650002 |
| 0.322340012 | 0.100539997 | 0.242520005 |
| 0.666670024 | 0.000000000 | 0.000000000 |
| 0.832769990 | 0.999260008 | 0.146589994 |
| 0.487480015 | 0.000320000 | 0.270449996 |
| 0.500000000 | 0.000000000 | 0.068439998 |
| 0.663309991 | 0.999700010 | 0.205789998 |
| 0.833329976 | 0.100000001 | 0.034219999 |
| 0.500000000 | 0.100000001 | 0.171090007 |
| 0.666670024 | 0.100000001 | 0.102650002 |
| 0.166669995 | 0.200000003 | 0.000000000 |
| 0.333330005 | 0.200000003 | 0.136869997 |
| 0.000000000 | 0.200000003 | 0.068439998 |
| 0.159869999 | 0.199410006 | 0.209439993 |
| 0.333330005 | 0.300000012 | 0.034219999 |
| 0.000000000 | 0.300000012 | 0.171090007 |
| 0.166669995 | 0.300000012 | 0.102650002 |
| 0.319270015 | 0.298619986 | 0.242630005 |
| 0.666670024 | 0.200000003 | 0.000000000 |

---

|             |             |             |
|-------------|-------------|-------------|
| 0.835640013 | 0.199000001 | 0.144400001 |
| 0.483539999 | 0.197369993 | 0.276870012 |
| 0.500000000 | 0.200000003 | 0.068439998 |
| 0.671570003 | 0.197469994 | 0.205870003 |
| 0.833329976 | 0.300000012 | 0.034219999 |
| 0.500000000 | 0.300000012 | 0.171090007 |
| 0.666670024 | 0.300000012 | 0.102650002 |
| 0.166669995 | 0.400000006 | 0.000000000 |
| 0.333330005 | 0.400000006 | 0.136869997 |
| 0.000000000 | 0.400000006 | 0.068439998 |
| 0.158570006 | 0.400079995 | 0.208890006 |
| 0.333330005 | 0.500000000 | 0.034219999 |
| 0.000000000 | 0.500000000 | 0.171090007 |
| 0.166669995 | 0.500000000 | 0.102650002 |
| 0.319770008 | 0.503570020 | 0.242599994 |
| 0.666670024 | 0.400000006 | 0.000000000 |
| 0.836780012 | 0.400119990 | 0.141800001 |
| 0.478210002 | 0.401179999 | 0.270139992 |
| 0.500000000 | 0.400000006 | 0.068439998 |
| 0.681119978 | 0.400959998 | 0.207719997 |
| 0.833329976 | 0.500000000 | 0.034219999 |
| 0.500000000 | 0.500000000 | 0.171090007 |
| 0.666670024 | 0.500000000 | 0.102650002 |
| 0.166669995 | 0.600000024 | 0.000000000 |
| 0.333330005 | 0.600000024 | 0.136869997 |
| 0.000000000 | 0.600000024 | 0.068439998 |
| 0.158170000 | 0.601760030 | 0.208900005 |
| 0.333330005 | 0.699999988 | 0.034219999 |
| 0.000000000 | 0.699999988 | 0.171090007 |
| 0.166669995 | 0.699999988 | 0.102650002 |
| 0.323659986 | 0.700869977 | 0.242599994 |
| 0.666670024 | 0.600000024 | 0.000000000 |
| 0.834850013 | 0.600839972 | 0.144749999 |
| 0.482919991 | 0.599529982 | 0.275389999 |
| 0.500000000 | 0.600000024 | 0.068439998 |
| 0.671060026 | 0.601490021 | 0.206279993 |
| 0.833329976 | 0.699999988 | 0.034219999 |
| 0.500000000 | 0.699999988 | 0.171090007 |
| 0.666670024 | 0.699999988 | 0.102650002 |
| 0.166669995 | 0.800000012 | 0.000000000 |
| 0.333330005 | 0.800000012 | 0.136869997 |
| 0.000000000 | 0.800000012 | 0.068439998 |
| 0.158859998 | 0.802510023 | 0.209309995 |
| 0.333330005 | 0.899999976 | 0.034219999 |

---

|             |             |             |
|-------------|-------------|-------------|
| 0.000000000 | 0.899999976 | 0.171090007 |
| 0.166669995 | 0.899999976 | 0.102650002 |
| 0.322149992 | 0.899739981 | 0.242369995 |
| 0.666670024 | 0.800000012 | 0.000000000 |
| 0.831979990 | 0.800570011 | 0.146640003 |
| 0.493880004 | 0.802370012 | 0.272859991 |
| 0.500000000 | 0.800000012 | 0.068439998 |
| 0.671800017 | 0.802309990 | 0.211870000 |
| 0.833329976 | 0.899999976 | 0.034219999 |
| 0.500000000 | 0.899999976 | 0.171090007 |
| 0.666670024 | 0.899999976 | 0.102650002 |
| 0.621450007 | 0.318349987 | 0.311830014 |
| 0.635559976 | 0.197699994 | 0.290399998 |
| 0.712559998 | 0.392630011 | 0.288509995 |
| 0.637849987 | 0.631690025 | 0.293709993 |
| 0.678089976 | 0.812640011 | 0.335539997 |
| 0.641460001 | 0.773039997 | 0.295850009 |

---

NiO<sub>x</sub>/Pt<sub>(100)</sub>

\*

1.0

|               |               |               |
|---------------|---------------|---------------|
| 11.0985002518 | 0.0000000000  | 0.0000000000  |
| 0.0000000000  | 11.0985002518 | 0.0000000000  |
| 0.0000000000  | 0.0000000000  | 25.8477993011 |

Pt Ni O

80 5 4

Direct

|              |              |              |
|--------------|--------------|--------------|
| 0.0000000000 | 0.0000000000 | 0.0000000000 |
| 0.0000000000 | 0.0000000000 | 0.151810005  |
| 0.999961972  | 0.000135000  | 0.307092994  |
| 0.125000000  | 0.125000000  | 0.075900003  |
| 0.125542998  | 0.125700995  | 0.230226994  |
| 0.250000000  | 0.000000000  | 0.000000000  |
| 0.250000000  | 0.000000000  | 0.151810005  |
| 0.248777002  | 0.000421000  | 0.307220012  |
| 0.375000000  | 0.125000000  | 0.075900003  |
| 0.374985009  | 0.125712007  | 0.230462000  |
| 0.500000000  | 0.000000000  | 0.000000000  |
| 0.500000000  | 0.000000000  | 0.151810005  |
| 0.499922007  | 0.000408000  | 0.307327986  |
| 0.625000000  | 0.125000000  | 0.075900003  |
| 0.624966979  | 0.125729993  | 0.230453998  |
| 0.750000000  | 0.000000000  | 0.000000000  |
| 0.750000000  | 0.000000000  | 0.151810005  |
| 0.751101971  | 0.000556000  | 0.307209998  |
| 0.875000000  | 0.125000000  | 0.075900003  |
| 0.874418020  | 0.125758007  | 0.230241001  |
| 0.000000000  | 0.250000000  | 0.000000000  |
| 0.000000000  | 0.250000000  | 0.151810005  |
| 0.999998987  | 0.249001995  | 0.307222009  |
| 0.125000000  | 0.375000000  | 0.075900003  |
| 0.125413999  | 0.375124007  | 0.230456993  |
| 0.250000000  | 0.250000000  | 0.000000000  |
| 0.250000000  | 0.250000000  | 0.151810005  |
| 0.247171000  | 0.247611001  | 0.309731007  |
| 0.375000000  | 0.375000000  | 0.075900003  |
| 0.374096006  | 0.374231994  | 0.230134994  |
| 0.500000000  | 0.250000000  | 0.000000000  |
| 0.500000000  | 0.250000000  | 0.151810005  |
| 0.500033975  | 0.243773997  | 0.309307992  |
| 0.625000000  | 0.375000000  | 0.075900003  |
| 0.625917971  | 0.374267012  | 0.230140001  |



---

|             |             |             |
|-------------|-------------|-------------|
| 0.750000000 | 0.250000000 | 0.000000000 |
| 0.750000000 | 0.250000000 | 0.151810005 |
| 0.752793014 | 0.247750998 | 0.309733987 |
| 0.875000000 | 0.375000000 | 0.075900003 |
| 0.874522984 | 0.375169009 | 0.230467007 |
| 0.000000000 | 0.500000000 | 0.000000000 |
| 0.000000000 | 0.500000000 | 0.151810005 |
| 0.999882996 | 0.500223994 | 0.307330012 |
| 0.125000000 | 0.625000000 | 0.075900003 |
| 0.125363007 | 0.625102997 | 0.230418995 |
| 0.250000000 | 0.500000000 | 0.000000000 |
| 0.250000000 | 0.500000000 | 0.151810005 |
| 0.243233994 | 0.500401974 | 0.309246004 |
| 0.375000000 | 0.625000000 | 0.075900003 |
| 0.374027014 | 0.626048028 | 0.230113000 |
| 0.500000000 | 0.500000000 | 0.000000000 |
| 0.500000000 | 0.500000000 | 0.151810005 |
| 0.499994993 | 0.500418007 | 0.303557992 |
| 0.625000000 | 0.625000000 | 0.075900003 |
| 0.625898004 | 0.626073003 | 0.230105996 |
| 0.750000000 | 0.500000000 | 0.000000000 |
| 0.750000000 | 0.500000000 | 0.151810005 |
| 0.756657004 | 0.500568986 | 0.309267014 |
| 0.875000000 | 0.625000000 | 0.075900003 |
| 0.874504030 | 0.625153005 | 0.230416998 |
| 0.000000000 | 0.750000000 | 0.000000000 |
| 0.000000000 | 0.750000000 | 0.151810005 |
| 0.999849975 | 0.751323998 | 0.307209998 |
| 0.125000000 | 0.875000000 | 0.075900003 |
| 0.125476003 | 0.874602973 | 0.230230004 |
| 0.250000000 | 0.750000000 | 0.000000000 |
| 0.250000000 | 0.750000000 | 0.151810005 |
| 0.246975005 | 0.753289998 | 0.309688002 |
| 0.375000000 | 0.875000000 | 0.075900003 |
| 0.374949992 | 0.874805987 | 0.230413005 |
| 0.500000000 | 0.750000000 | 0.000000000 |
| 0.500000000 | 0.750000000 | 0.151810005 |
| 0.499927998 | 0.757115006 | 0.309213996 |
| 0.625000000 | 0.875000000 | 0.075900003 |
| 0.624942005 | 0.874864995 | 0.230416000 |
| 0.750000000 | 0.750000000 | 0.000000000 |
| 0.750000000 | 0.750000000 | 0.151810005 |
| 0.752668977 | 0.753461003 | 0.309680998 |
| 0.875000000 | 0.875000000 | 0.075900003 |

---

|             |             |             |
|-------------|-------------|-------------|
| 0.874396980 | 0.874646008 | 0.230228007 |
| 0.499855995 | 0.501043975 | 0.430947989 |
| 0.625793993 | 0.374846995 | 0.372842997 |
| 0.374173999 | 0.626568973 | 0.372662008 |
| 0.374105006 | 0.374794990 | 0.372792006 |
| 0.625881016 | 0.626522005 | 0.372759998 |
| 0.499906987 | 0.336149007 | 0.419512004 |
| 0.664669991 | 0.500867009 | 0.419416994 |
| 0.335054994 | 0.500874996 | 0.419333011 |
| 0.499980986 | 0.665814996 | 0.419362009 |

CO\*

|    |    |   |   |
|----|----|---|---|
| Pt | Ni | O | C |
| 80 | 5  | 5 | 1 |

Direct

|             |             |             |
|-------------|-------------|-------------|
| 0.000000000 | 0.000000000 | 0.000000000 |
| 0.000000000 | 0.000000000 | 0.151810005 |
| 0.000639000 | 0.000682000 | 0.306309015 |
| 0.125000000 | 0.125000000 | 0.075900003 |
| 0.126117006 | 0.126543999 | 0.229567006 |
| 0.250000000 | 0.000000000 | 0.000000000 |
| 0.250000000 | 0.000000000 | 0.151810005 |
| 0.249592006 | 0.001340000 | 0.306270003 |
| 0.375000000 | 0.125000000 | 0.075900003 |
| 0.375851989 | 0.126497000 | 0.230176002 |
| 0.500000000 | 0.000000000 | 0.000000000 |
| 0.500000000 | 0.000000000 | 0.151810005 |
| 0.500617981 | 0.001029000 | 0.306493998 |
| 0.625000000 | 0.125000000 | 0.075900003 |
| 0.625056982 | 0.127000004 | 0.230203003 |
| 0.750000000 | 0.000000000 | 0.000000000 |
| 0.750000000 | 0.000000000 | 0.151810005 |
| 0.751392007 | 0.001212000 | 0.306695998 |
| 0.875000000 | 0.125000000 | 0.075900003 |
| 0.874228001 | 0.126745000 | 0.229917005 |
| 0.000000000 | 0.250000000 | 0.000000000 |
| 0.000000000 | 0.250000000 | 0.151810005 |
| 0.001021000 | 0.247447997 | 0.306133002 |
| 0.125000000 | 0.375000000 | 0.075900003 |
| 0.125770003 | 0.376421005 | 0.230413005 |
| 0.250000000 | 0.250000000 | 0.000000000 |
| 0.250000000 | 0.250000000 | 0.151810005 |
| 0.248673007 | 0.248379007 | 0.308975011 |
| 0.375000000 | 0.375000000 | 0.075900003 |

---

|             |             |             |
|-------------|-------------|-------------|
| 0.376910001 | 0.374556005 | 0.229845002 |
| 0.500000000 | 0.250000000 | 0.000000000 |
| 0.500000000 | 0.250000000 | 0.151810005 |
| 0.500569999 | 0.244681999 | 0.309767008 |
| 0.625000000 | 0.375000000 | 0.075900003 |
| 0.628875017 | 0.375809014 | 0.230829999 |
| 0.750000000 | 0.250000000 | 0.000000000 |
| 0.750000000 | 0.250000000 | 0.151810005 |
| 0.751244009 | 0.247654006 | 0.309818000 |
| 0.875000000 | 0.375000000 | 0.075900003 |
| 0.875245988 | 0.376836985 | 0.231328994 |
| 0.000000000 | 0.500000000 | 0.000000000 |
| 0.000000000 | 0.500000000 | 0.151810005 |
| 0.010733000 | 0.500576973 | 0.311668009 |
| 0.125000000 | 0.625000000 | 0.075900003 |
| 0.125551999 | 0.624590993 | 0.230376005 |
| 0.250000000 | 0.500000000 | 0.000000000 |
| 0.250000000 | 0.500000000 | 0.151810005 |
| 0.249936000 | 0.501390994 | 0.307597995 |
| 0.375000000 | 0.625000000 | 0.075900003 |
| 0.376837999 | 0.626295984 | 0.229756996 |
| 0.500000000 | 0.500000000 | 0.000000000 |
| 0.500000000 | 0.500000000 | 0.151810005 |
| 0.504956007 | 0.501147985 | 0.304208010 |
| 0.625000000 | 0.625000000 | 0.075900003 |
| 0.629124999 | 0.625042975 | 0.230817005 |
| 0.750000000 | 0.500000000 | 0.000000000 |
| 0.750000000 | 0.500000000 | 0.151810005 |
| 0.761891007 | 0.501205981 | 0.316354990 |
| 0.875000000 | 0.625000000 | 0.075900003 |
| 0.875370979 | 0.623924017 | 0.231277004 |
| 0.000000000 | 0.750000000 | 0.000000000 |
| 0.000000000 | 0.750000000 | 0.151810005 |
| 0.000889000 | 0.753924012 | 0.306089014 |
| 0.125000000 | 0.875000000 | 0.075900003 |
| 0.126093000 | 0.874692023 | 0.229494005 |
| 0.250000000 | 0.750000000 | 0.000000000 |
| 0.250000000 | 0.750000000 | 0.151810005 |
| 0.248392999 | 0.754482985 | 0.308654994 |
| 0.375000000 | 0.875000000 | 0.075900003 |
| 0.375791997 | 0.874834001 | 0.229981005 |
| 0.500000000 | 0.750000000 | 0.000000000 |
| 0.500000000 | 0.750000000 | 0.151810005 |
| 0.500663996 | 0.757817984 | 0.309220999 |

---

|             |             |             |
|-------------|-------------|-------------|
| 0.625000000 | 0.875000000 | 0.075900003 |
| 0.625252008 | 0.874378026 | 0.230022997 |
| 0.750000000 | 0.750000000 | 0.000000000 |
| 0.750000000 | 0.750000000 | 0.151810005 |
| 0.751730025 | 0.754905999 | 0.309529990 |
| 0.875000000 | 0.875000000 | 0.075900003 |
| 0.874332011 | 0.874412000 | 0.229819998 |
| 0.491539001 | 0.503618002 | 0.432763010 |
| 0.621174991 | 0.375330001 | 0.375674993 |
| 0.372803003 | 0.628230989 | 0.372258008 |
| 0.372837991 | 0.376439989 | 0.372763991 |
| 0.621710002 | 0.629815996 | 0.375187010 |
| 0.493896991 | 0.338301986 | 0.421344012 |
| 0.654855013 | 0.503293991 | 0.422733009 |
| 0.328310996 | 0.503102005 | 0.418482006 |
| 0.494042009 | 0.668657005 | 0.420542002 |
| 0.904444993 | 0.497604012 | 0.416296005 |
| 0.898357987 | 0.499195993 | 0.370779991 |

TS1

|    |    |   |   |
|----|----|---|---|
| Pt | Ni | O | C |
| 80 | 5  | 5 | 1 |

Direct

|             |             |             |
|-------------|-------------|-------------|
| 0.000000000 | 0.000000000 | 0.000000000 |
| 0.000000000 | 0.000000000 | 0.151810005 |
| 0.000639674 | 0.000681190 | 0.306309253 |
| 0.125000000 | 0.125000000 | 0.075900003 |
| 0.126118183 | 0.126542270 | 0.229567856 |
| 0.250000000 | 0.000000000 | 0.000000000 |
| 0.250000000 | 0.000000000 | 0.151810005 |
| 0.249591306 | 0.001340175 | 0.306269705 |
| 0.375000000 | 0.125000000 | 0.075900003 |
| 0.375851154 | 0.126497895 | 0.230177671 |
| 0.500000000 | 0.000000000 | 0.000000000 |
| 0.500000000 | 0.000000000 | 0.151810005 |
| 0.500618994 | 0.001029378 | 0.306492746 |
| 0.625000000 | 0.125000000 | 0.075900003 |
| 0.625057936 | 0.126999766 | 0.230202019 |
| 0.750000000 | 0.000000000 | 0.000000000 |
| 0.750000000 | 0.000000000 | 0.151810005 |
| 0.751391292 | 0.001211002 | 0.306697398 |
| 0.874999940 | 0.125000000 | 0.075900003 |
| 0.874228895 | 0.126746625 | 0.229917854 |
| 0.000000000 | 0.250000000 | 0.000000000 |

---

|             |             |             |
|-------------|-------------|-------------|
| 0.000000000 | 0.250000000 | 0.151810005 |
| 0.001020918 | 0.247448534 | 0.306132108 |
| 0.125000000 | 0.375000000 | 0.075900003 |
| 0.125770316 | 0.376420528 | 0.230412111 |
| 0.250000000 | 0.250000000 | 0.000000000 |
| 0.250000000 | 0.250000000 | 0.151810005 |
| 0.248671800 | 0.248379096 | 0.308976978 |
| 0.375000000 | 0.375000000 | 0.075900003 |
| 0.376910150 | 0.374557227 | 0.229843140 |
| 0.500000000 | 0.250000000 | 0.000000000 |
| 0.500000000 | 0.250000000 | 0.151810005 |
| 0.500569940 | 0.244681507 | 0.309768230 |
| 0.625000000 | 0.375000000 | 0.075900003 |
| 0.628873289 | 0.375809461 | 0.230830014 |
| 0.750000000 | 0.250000000 | 0.000000000 |
| 0.750000000 | 0.250000000 | 0.151810005 |
| 0.751242638 | 0.247652784 | 0.309818834 |
| 0.874999940 | 0.375000000 | 0.075900003 |
| 0.875247121 | 0.376838207 | 0.231329262 |
| 0.000000000 | 0.500000000 | 0.000000000 |
| 0.000000000 | 0.500000000 | 0.151810005 |
| 0.010732180 | 0.500577807 | 0.311668843 |
| 0.125000000 | 0.625000000 | 0.075900003 |
| 0.125551224 | 0.624590874 | 0.230377406 |
| 0.250000000 | 0.500000000 | 0.000000000 |
| 0.250000000 | 0.500000000 | 0.151810005 |
| 0.249937519 | 0.501390755 | 0.307598650 |
| 0.375000000 | 0.625000000 | 0.075900003 |
| 0.376838982 | 0.626297712 | 0.229758024 |
| 0.500000000 | 0.500000000 | 0.000000000 |
| 0.500000000 | 0.500000000 | 0.151810005 |
| 0.504957438 | 0.501148820 | 0.304208457 |
| 0.625000000 | 0.625000000 | 0.075900003 |
| 0.629123211 | 0.625041664 | 0.230817765 |
| 0.750000000 | 0.500000000 | 0.000000000 |
| 0.750000000 | 0.500000000 | 0.151810005 |
| 0.761890769 | 0.501207590 | 0.316356719 |
| 0.874999940 | 0.625000000 | 0.075900003 |
| 0.875370502 | 0.623922348 | 0.231278330 |
| 0.000000000 | 0.750000000 | 0.000000000 |
| 0.000000000 | 0.750000000 | 0.151810005 |
| 0.000889162 | 0.753922760 | 0.306089550 |
| 0.125000000 | 0.874999940 | 0.075900003 |
| 0.126091823 | 0.874691486 | 0.229492858 |

---

|             |             |             |
|-------------|-------------|-------------|
| 0.250000000 | 0.750000000 | 0.000000000 |
| 0.250000000 | 0.750000000 | 0.151810005 |
| 0.248391792 | 0.754481912 | 0.308653027 |
| 0.375000000 | 0.874999940 | 0.075900003 |
| 0.375791252 | 0.874832332 | 0.229980364 |
| 0.500000000 | 0.750000000 | 0.000000000 |
| 0.500000000 | 0.750000000 | 0.151810005 |
| 0.500662565 | 0.757818878 | 0.309220314 |
| 0.625000000 | 0.874999940 | 0.075900003 |
| 0.625251472 | 0.874378800 | 0.230022043 |
| 0.750000000 | 0.750000000 | 0.000000000 |
| 0.750000000 | 0.750000000 | 0.151810005 |
| 0.751730025 | 0.754907131 | 0.309530020 |
| 0.874999940 | 0.874999940 | 0.075900003 |
| 0.874330997 | 0.874411523 | 0.229819834 |
| 0.493158162 | 0.502281010 | 0.436954349 |
| 0.614347875 | 0.373306990 | 0.376053542 |
| 0.374388784 | 0.625965536 | 0.374300480 |
| 0.374411851 | 0.377752662 | 0.374605358 |
| 0.614610732 | 0.630335987 | 0.375681847 |
| 0.493854016 | 0.339479029 | 0.421630800 |
| 0.667208672 | 0.502243698 | 0.419967771 |
| 0.333308071 | 0.502157331 | 0.418657184 |
| 0.493947297 | 0.664833069 | 0.421168327 |
| 0.888669431 | 0.497685492 | 0.420336932 |
| 0.810292423 | 0.499439329 | 0.388880253 |

O<sub>Van</sub>

|    |    |   |
|----|----|---|
| Pt | Ni | O |
| 80 | 5  | 3 |

Direct

|             |             |             |
|-------------|-------------|-------------|
| 0.000000000 | 0.000000000 | 0.000000000 |
| 0.000000000 | 0.000000000 | 0.151810005 |
| 0.000037000 | 0.000302000 | 0.306468010 |
| 0.125000000 | 0.125000000 | 0.075900003 |
| 0.124929003 | 0.125875995 | 0.229822993 |
| 0.250000000 | 0.000000000 | 0.000000000 |
| 0.250000000 | 0.000000000 | 0.151810005 |
| 0.249011993 | 0.000397000 | 0.306544006 |
| 0.375000000 | 0.125000000 | 0.075900003 |
| 0.374695003 | 0.126294002 | 0.230204999 |
| 0.500000000 | 0.000000000 | 0.000000000 |
| 0.500000000 | 0.000000000 | 0.151810005 |
| 0.500461996 | 0.000440000 | 0.306661010 |

---

|             |             |             |
|-------------|-------------|-------------|
| 0.625000000 | 0.125000000 | 0.075900003 |
| 0.624974012 | 0.125810996 | 0.229872003 |
| 0.750000000 | 0.000000000 | 0.000000000 |
| 0.750000000 | 0.000000000 | 0.151810005 |
| 0.750681996 | 0.000523000 | 0.306713998 |
| 0.875000000 | 0.125000000 | 0.075900003 |
| 0.874481022 | 0.125927001 | 0.229884997 |
| 0.000000000 | 0.250000000 | 0.000000000 |
| 0.000000000 | 0.250000000 | 0.151810005 |
| 0.998902023 | 0.249387994 | 0.306962013 |
| 0.125000000 | 0.375000000 | 0.075900003 |
| 0.125304997 | 0.375645012 | 0.230529994 |
| 0.250000000 | 0.250000000 | 0.000000000 |
| 0.250000000 | 0.250000000 | 0.151810005 |
| 0.246234000 | 0.248772994 | 0.308620989 |
| 0.375000000 | 0.375000000 | 0.075900003 |
| 0.374244988 | 0.375840992 | 0.230524004 |
| 0.500000000 | 0.250000000 | 0.000000000 |
| 0.500000000 | 0.250000000 | 0.151810005 |
| 0.495721996 | 0.242887005 | 0.308266997 |
| 0.625000000 | 0.375000000 | 0.075900003 |
| 0.625391006 | 0.375155002 | 0.230472997 |
| 0.750000000 | 0.250000000 | 0.000000000 |
| 0.750000000 | 0.250000000 | 0.151810005 |
| 0.750500977 | 0.249152005 | 0.308272988 |
| 0.875000000 | 0.375000000 | 0.075900003 |
| 0.873914003 | 0.375972986 | 0.230676994 |
| 0.000000000 | 0.500000000 | 0.000000000 |
| 0.000000000 | 0.500000000 | 0.151810005 |
| 0.999253988 | 0.500221014 | 0.307386011 |
| 0.125000000 | 0.625000000 | 0.075900003 |
| 0.125193998 | 0.624722004 | 0.230517998 |
| 0.250000000 | 0.500000000 | 0.000000000 |
| 0.250000000 | 0.500000000 | 0.151810005 |
| 0.244632006 | 0.500376999 | 0.310274005 |
| 0.375000000 | 0.625000000 | 0.075900003 |
| 0.374170989 | 0.624638975 | 0.230497003 |
| 0.500000000 | 0.500000000 | 0.000000000 |
| 0.500000000 | 0.500000000 | 0.151810005 |
| 0.500721991 | 0.500299990 | 0.305698007 |
| 0.625000000 | 0.625000000 | 0.075900003 |
| 0.625334024 | 0.625395000 | 0.230465993 |
| 0.750000000 | 0.500000000 | 0.000000000 |
| 0.750000000 | 0.500000000 | 0.151810005 |

|             |             |             |
|-------------|-------------|-------------|
| 0.754778981 | 0.500461996 | 0.312171996 |
| 0.875000000 | 0.625000000 | 0.075900003 |
| 0.873809993 | 0.624446988 | 0.230682999 |
| 0.000000000 | 0.750000000 | 0.000000000 |
| 0.000000000 | 0.750000000 | 0.151810005 |
| 0.998749018 | 0.751089990 | 0.306979001 |
| 0.125000000 | 0.875000000 | 0.075900003 |
| 0.124812998 | 0.874516010 | 0.229830995 |
| 0.250000000 | 0.750000000 | 0.000000000 |
| 0.250000000 | 0.750000000 | 0.151810005 |
| 0.246052995 | 0.752004027 | 0.308564007 |
| 0.375000000 | 0.875000000 | 0.075900003 |
| 0.374612004 | 0.874292016 | 0.230168000 |
| 0.500000000 | 0.750000000 | 0.000000000 |
| 0.500000000 | 0.750000000 | 0.151810005 |
| 0.495570987 | 0.757875979 | 0.308187991 |
| 0.625000000 | 0.875000000 | 0.075900003 |
| 0.624956012 | 0.874734998 | 0.229890004 |
| 0.750000000 | 0.750000000 | 0.000000000 |
| 0.750000000 | 0.750000000 | 0.151810005 |
| 0.750442982 | 0.751869023 | 0.308259010 |
| 0.875000000 | 0.875000000 | 0.075900003 |
| 0.874432027 | 0.874503016 | 0.229885995 |
| 0.504033983 | 0.500658989 | 0.431968004 |
| 0.617909014 | 0.369635999 | 0.371297002 |
| 0.374523014 | 0.627596974 | 0.375126988 |
| 0.374318004 | 0.373432994 | 0.375337988 |
| 0.617944002 | 0.631101012 | 0.371239007 |
| 0.507107973 | 0.340113997 | 0.419544011 |
| 0.341145992 | 0.500639975 | 0.418219000 |
| 0.506986976 | 0.661171973 | 0.419402003 |

O#

|    |    |   |
|----|----|---|
| Pt | Ni | O |
| 80 | 5  | 5 |

Direct

|             |             |             |
|-------------|-------------|-------------|
| 0.000000000 | 0.000000000 | 0.000000000 |
| 0.000000000 | 0.000000000 | 0.151810005 |
| 0.000186000 | 0.000148000 | 0.306425005 |
| 0.125000000 | 0.125000000 | 0.075900003 |
| 0.125993997 | 0.125552997 | 0.230047002 |
| 0.250000000 | 0.000000000 | 0.000000000 |
| 0.250000000 | 0.000000000 | 0.151810005 |
| 0.249469995 | 0.000150000 | 0.306946009 |



---

|             |             |             |
|-------------|-------------|-------------|
| 0.375000000 | 0.125000000 | 0.075900003 |
| 0.375752985 | 0.125762999 | 0.230653003 |
| 0.500000000 | 0.000000000 | 0.000000000 |
| 0.500000000 | 0.000000000 | 0.151810005 |
| 0.500226021 | 0.000147000 | 0.307233006 |
| 0.625000000 | 0.125000000 | 0.075900003 |
| 0.624741971 | 0.125622004 | 0.230508000 |
| 0.750000000 | 0.000000000 | 0.000000000 |
| 0.750000000 | 0.000000000 | 0.151810005 |
| 0.750833988 | 0.000194000 | 0.306820989 |
| 0.875000000 | 0.125000000 | 0.075900003 |
| 0.874633014 | 0.125562996 | 0.229968995 |
| 0.000000000 | 0.250000000 | 0.000000000 |
| 0.000000000 | 0.250000000 | 0.151810005 |
| 0.000484000 | 0.249422997 | 0.306692004 |
| 0.125000000 | 0.375000000 | 0.075900003 |
| 0.125798002 | 0.375156999 | 0.230267003 |
| 0.250000000 | 0.250000000 | 0.000000000 |
| 0.250000000 | 0.250000000 | 0.151810005 |
| 0.250196993 | 0.249693006 | 0.308481008 |
| 0.375000000 | 0.375000000 | 0.075900003 |
| 0.374807000 | 0.374444991 | 0.230114996 |
| 0.500000000 | 0.250000000 | 0.000000000 |
| 0.500000000 | 0.250000000 | 0.151810005 |
| 0.501518011 | 0.246758997 | 0.310784012 |
| 0.625000000 | 0.375000000 | 0.075900003 |
| 0.625263989 | 0.374222994 | 0.229929000 |
| 0.750000000 | 0.250000000 | 0.000000000 |
| 0.750000000 | 0.250000000 | 0.151810005 |
| 0.751151025 | 0.249590993 | 0.308443993 |
| 0.875000000 | 0.375000000 | 0.075900003 |
| 0.874702990 | 0.375086010 | 0.230214998 |
| 0.000000000 | 0.500000000 | 0.000000000 |
| 0.000000000 | 0.500000000 | 0.151810005 |
| 0.000212000 | 0.500077009 | 0.306869000 |
| 0.125000000 | 0.625000000 | 0.075900003 |
| 0.125735000 | 0.624935985 | 0.230261996 |
| 0.250000000 | 0.500000000 | 0.000000000 |
| 0.250000000 | 0.500000000 | 0.151810005 |
| 0.246097997 | 0.500078976 | 0.309222013 |
| 0.375000000 | 0.625000000 | 0.075900003 |
| 0.374716997 | 0.625648022 | 0.230092004 |
| 0.500000000 | 0.500000000 | 0.000000000 |
| 0.500000000 | 0.500000000 | 0.151810005 |

|             |             |             |
|-------------|-------------|-------------|
| 0.500298023 | 0.500136018 | 0.304477990 |
| 0.625000000 | 0.625000000 | 0.075900003 |
| 0.625225008 | 0.625904024 | 0.229902998 |
| 0.750000000 | 0.500000000 | 0.000000000 |
| 0.750000000 | 0.500000000 | 0.151810005 |
| 0.753727973 | 0.500217974 | 0.308277011 |
| 0.875000000 | 0.625000000 | 0.075900003 |
| 0.874702990 | 0.625091016 | 0.230195001 |
| 0.000000000 | 0.750000000 | 0.000000000 |
| 0.000000000 | 0.750000000 | 0.151810005 |
| 0.000372000 | 0.750764012 | 0.306683987 |
| 0.125000000 | 0.875000000 | 0.075900003 |
| 0.125933006 | 0.874596000 | 0.230031997 |
| 0.250000000 | 0.750000000 | 0.000000000 |
| 0.250000000 | 0.750000000 | 0.151810005 |
| 0.249981999 | 0.750606000 | 0.308434010 |
| 0.375000000 | 0.875000000 | 0.075900003 |
| 0.375634998 | 0.874485016 | 0.230597004 |
| 0.500000000 | 0.750000000 | 0.000000000 |
| 0.500000000 | 0.750000000 | 0.151810005 |
| 0.501224995 | 0.753642023 | 0.310595006 |
| 0.625000000 | 0.875000000 | 0.075900003 |
| 0.624671996 | 0.874635994 | 0.230452001 |
| 0.750000000 | 0.750000000 | 0.000000000 |
| 0.750000000 | 0.750000000 | 0.151810005 |
| 0.751039982 | 0.750835001 | 0.308353990 |
| 0.875000000 | 0.875000000 | 0.075900003 |
| 0.874601007 | 0.874660015 | 0.229968995 |
| 0.485141993 | 0.500850976 | 0.449672997 |
| 0.622626007 | 0.380145997 | 0.376450002 |
| 0.377328992 | 0.621698976 | 0.375842005 |
| 0.377606988 | 0.378704011 | 0.376004010 |
| 0.622389019 | 0.621168971 | 0.376233995 |
| 0.498571992 | 0.346596986 | 0.421555996 |
| 0.332374007 | 0.500365019 | 0.420336992 |
| 0.498100013 | 0.654829025 | 0.421328008 |
| 0.643163979 | 0.501416028 | 0.468461990 |
| 0.694746017 | 0.501137972 | 0.418518007 |

TS2

|    |    |   |
|----|----|---|
| Pt | Ni | O |
| 80 | 5  | 5 |

Direct

|             |             |             |
|-------------|-------------|-------------|
| 0.000000000 | 0.000000000 | 0.000000000 |
|-------------|-------------|-------------|

---

|             |             |             |
|-------------|-------------|-------------|
| 0.000000000 | 0.000000000 | 0.151810005 |
| 0.000027000 | 0.000036000 | 0.306243986 |
| 0.125000000 | 0.125000000 | 0.075900003 |
| 0.125900999 | 0.125635996 | 0.229703993 |
| 0.250000000 | 0.000000000 | 0.000000000 |
| 0.250000000 | 0.000000000 | 0.151810005 |
| 0.249321997 | 0.000001000 | 0.306977987 |
| 0.375000000 | 0.125000000 | 0.075900003 |
| 0.375364006 | 0.125804007 | 0.230345994 |
| 0.500000000 | 0.000000000 | 0.000000000 |
| 0.500000000 | 0.000000000 | 0.151810005 |
| 0.499886990 | 0.999774992 | 0.307045996 |
| 0.625000000 | 0.125000000 | 0.075900003 |
| 0.624382019 | 0.125833005 | 0.230142996 |
| 0.750000000 | 0.000000000 | 0.000000000 |
| 0.750000000 | 0.000000000 | 0.151810005 |
| 0.750352979 | 0.999686003 | 0.307011008 |
| 0.875000000 | 0.125000000 | 0.075900003 |
| 0.874280989 | 0.125727996 | 0.229796007 |
| 0.000000000 | 0.250000000 | 0.000000000 |
| 0.000000000 | 0.250000000 | 0.151810005 |
| 0.999189019 | 0.248576000 | 0.307188004 |
| 0.125000000 | 0.375000000 | 0.075900003 |
| 0.124968000 | 0.375492990 | 0.230684996 |
| 0.250000000 | 0.250000000 | 0.000000000 |
| 0.250000000 | 0.250000000 | 0.151810005 |
| 0.247713998 | 0.247943997 | 0.308302999 |
| 0.375000000 | 0.375000000 | 0.075900003 |
| 0.375030011 | 0.374455988 | 0.229995996 |
| 0.500000000 | 0.250000000 | 0.000000000 |
| 0.500000000 | 0.250000000 | 0.151810005 |
| 0.500138998 | 0.246459007 | 0.310571015 |
| 0.625000000 | 0.375000000 | 0.075900003 |
| 0.626047015 | 0.375037998 | 0.230561003 |
| 0.750000000 | 0.250000000 | 0.000000000 |
| 0.750000000 | 0.250000000 | 0.151810005 |
| 0.749768019 | 0.245838001 | 0.308366001 |
| 0.875000000 | 0.375000000 | 0.075900003 |
| 0.874616027 | 0.375515014 | 0.230495006 |
| 0.000000000 | 0.500000000 | 0.000000000 |
| 0.000000000 | 0.500000000 | 0.151810005 |
| 0.003114000 | 0.500050008 | 0.307175010 |
| 0.125000000 | 0.625000000 | 0.075900003 |
| 0.124921001 | 0.624688029 | 0.230685994 |

---

|             |             |             |
|-------------|-------------|-------------|
| 0.250000000 | 0.500000000 | 0.000000000 |
| 0.250000000 | 0.500000000 | 0.151810005 |
| 0.247061998 | 0.499992013 | 0.308308989 |
| 0.375000000 | 0.625000000 | 0.075900003 |
| 0.374956995 | 0.625733972 | 0.229975998 |
| 0.500000000 | 0.500000000 | 0.000000000 |
| 0.500000000 | 0.500000000 | 0.151810005 |
| 0.502686977 | 0.500456989 | 0.306528986 |
| 0.625000000 | 0.625000000 | 0.075900003 |
| 0.626039028 | 0.625162005 | 0.230568007 |
| 0.750000000 | 0.500000000 | 0.000000000 |
| 0.750000000 | 0.500000000 | 0.151810005 |
| 0.757290006 | 0.498286992 | 0.313663989 |
| 0.875000000 | 0.625000000 | 0.075900003 |
| 0.874624014 | 0.624684989 | 0.230477005 |
| 0.000000000 | 0.750000000 | 0.000000000 |
| 0.000000000 | 0.750000000 | 0.151810005 |
| 0.999104977 | 0.751537025 | 0.307135999 |
| 0.125000000 | 0.875000000 | 0.075900003 |
| 0.125852004 | 0.874566972 | 0.229695007 |
| 0.250000000 | 0.750000000 | 0.000000000 |
| 0.250000000 | 0.750000000 | 0.151810005 |
| 0.248015001 | 0.751987994 | 0.308275014 |
| 0.375000000 | 0.875000000 | 0.075900003 |
| 0.375272006 | 0.874499977 | 0.230306998 |
| 0.500000000 | 0.750000000 | 0.000000000 |
| 0.500000000 | 0.750000000 | 0.151810005 |
| 0.500512004 | 0.753306985 | 0.310609013 |
| 0.625000000 | 0.875000000 | 0.075900003 |
| 0.624357998 | 0.874439001 | 0.230120003 |
| 0.750000000 | 0.750000000 | 0.000000000 |
| 0.750000000 | 0.750000000 | 0.151810005 |
| 0.749459028 | 0.752960980 | 0.308326989 |
| 0.875000000 | 0.875000000 | 0.075900003 |
| 0.874261022 | 0.874511003 | 0.229789004 |
| 0.487017989 | 0.498800993 | 0.434022993 |
| 0.616155028 | 0.366851002 | 0.382243007 |
| 0.368256003 | 0.625164986 | 0.374819994 |
| 0.366959989 | 0.374675006 | 0.374830991 |
| 0.620419979 | 0.634181023 | 0.384705991 |
| 0.486948013 | 0.334601998 | 0.421543986 |
| 0.326344013 | 0.499918997 | 0.418985009 |
| 0.486541003 | 0.664116025 | 0.422078013 |
| 0.665625989 | 0.502750993 | 0.428104997 |

---

|        |             |             |             |
|--------|-------------|-------------|-------------|
|        | 0.787436008 | 0.494769990 | 0.388718992 |
| O*     |             |             |             |
| Pt     | Ni          | O           |             |
| 80     | 5           | 5           |             |
| Direct |             |             |             |
|        | 0.000000000 | 0.000000000 | 0.000000000 |
|        | 0.000000000 | 0.000000000 | 0.151810005 |
|        | 0.999737024 | 0.000150000 | 0.306098998 |
|        | 0.125000000 | 0.125000000 | 0.075900003 |
|        | 0.125808001 | 0.125719994 | 0.229359999 |
|        | 0.250000000 | 0.000000000 | 0.000000000 |
|        | 0.250000000 | 0.000000000 | 0.151810005 |
|        | 0.249050006 | 0.000388000 | 0.306311011 |
|        | 0.375000000 | 0.125000000 | 0.075900003 |
|        | 0.374976009 | 0.125845999 | 0.230039001 |
|        | 0.500000000 | 0.000000000 | 0.000000000 |
|        | 0.500000000 | 0.000000000 | 0.151810005 |
|        | 0.499862999 | 0.000342000 | 0.306620002 |
|        | 0.625000000 | 0.125000000 | 0.075900003 |
|        | 0.624022007 | 0.126044005 | 0.229778007 |
|        | 0.750000000 | 0.000000000 | 0.000000000 |
|        | 0.750000000 | 0.000000000 | 0.151810005 |
|        | 0.750140011 | 0.000380000 | 0.306457013 |
|        | 0.875000000 | 0.125000000 | 0.075900003 |
|        | 0.873929024 | 0.125893995 | 0.229624003 |
|        | 0.000000000 | 0.250000000 | 0.000000000 |
|        | 0.000000000 | 0.250000000 | 0.151810005 |
|        | 0.999779999 | 0.245233998 | 0.306223005 |
|        | 0.125000000 | 0.375000000 | 0.075900003 |
|        | 0.124139003 | 0.375829011 | 0.231103003 |
|        | 0.250000000 | 0.250000000 | 0.000000000 |
|        | 0.250000000 | 0.250000000 | 0.151810005 |
|        | 0.248980999 | 0.248132005 | 0.308642000 |
|        | 0.375000000 | 0.375000000 | 0.075900003 |
|        | 0.375254005 | 0.374466002 | 0.229877993 |
|        | 0.500000000 | 0.250000000 | 0.000000000 |
|        | 0.500000000 | 0.250000000 | 0.151810005 |
|        | 0.498793006 | 0.245128006 | 0.309673011 |
|        | 0.625000000 | 0.375000000 | 0.075900003 |
|        | 0.626830995 | 0.375851989 | 0.231191993 |
|        | 0.750000000 | 0.250000000 | 0.000000000 |
|        | 0.750000000 | 0.250000000 | 0.151810005 |
|        | 0.748292029 | 0.246484995 | 0.308362007 |

---

|             |             |             |
|-------------|-------------|-------------|
| 0.875000000 | 0.375000000 | 0.075900003 |
| 0.874529004 | 0.375945002 | 0.230774999 |
| 0.000000000 | 0.500000000 | 0.000000000 |
| 0.000000000 | 0.500000000 | 0.151810005 |
| 0.012625000 | 0.500177026 | 0.310341001 |
| 0.125000000 | 0.625000000 | 0.075900003 |
| 0.124107003 | 0.624440014 | 0.231110007 |
| 0.250000000 | 0.500000000 | 0.000000000 |
| 0.250000000 | 0.500000000 | 0.151810005 |
| 0.250055999 | 0.500276029 | 0.308458000 |
| 0.375000000 | 0.625000000 | 0.075900003 |
| 0.375196993 | 0.625819981 | 0.229861006 |
| 0.500000000 | 0.500000000 | 0.000000000 |
| 0.500000000 | 0.500000000 | 0.151810005 |
| 0.499105990 | 0.500265002 | 0.305711001 |
| 0.625000000 | 0.625000000 | 0.075900003 |
| 0.626854002 | 0.624419987 | 0.231232002 |
| 0.750000000 | 0.500000000 | 0.000000000 |
| 0.750000000 | 0.500000000 | 0.151810005 |
| 0.750586987 | 0.500455976 | 0.313145995 |
| 0.875000000 | 0.625000000 | 0.075900003 |
| 0.874544978 | 0.624278009 | 0.230758995 |
| 0.000000000 | 0.750000000 | 0.000000000 |
| 0.000000000 | 0.750000000 | 0.151810005 |
| 0.999710023 | 0.755010009 | 0.306241989 |
| 0.125000000 | 0.875000000 | 0.075900003 |
| 0.125771001 | 0.874538004 | 0.229358003 |
| 0.250000000 | 0.750000000 | 0.000000000 |
| 0.250000000 | 0.750000000 | 0.151810005 |
| 0.248833001 | 0.752550006 | 0.308613002 |
| 0.375000000 | 0.875000000 | 0.075900003 |
| 0.374909997 | 0.874516010 | 0.230018005 |
| 0.500000000 | 0.750000000 | 0.000000000 |
| 0.500000000 | 0.750000000 | 0.151810005 |
| 0.498705000 | 0.755634010 | 0.309592009 |
| 0.625000000 | 0.875000000 | 0.075900003 |
| 0.624045014 | 0.874240994 | 0.229788005 |
| 0.750000000 | 0.750000000 | 0.000000000 |
| 0.750000000 | 0.750000000 | 0.151810005 |
| 0.748365998 | 0.754173994 | 0.308385015 |
| 0.875000000 | 0.875000000 | 0.075900003 |
| 0.873921990 | 0.874361992 | 0.229609996 |
| 0.491569012 | 0.500921011 | 0.437873006 |
| 0.617138028 | 0.376785010 | 0.377400994 |

---

|             |             |             |
|-------------|-------------|-------------|
| 0.371771008 | 0.624777973 | 0.375752985 |
| 0.371722013 | 0.376358986 | 0.375932992 |
| 0.617093980 | 0.624614000 | 0.377319008 |
| 0.493146986 | 0.337586999 | 0.421591014 |
| 0.329946011 | 0.500757992 | 0.419853985 |
| 0.493039995 | 0.664106011 | 0.421431005 |
| 0.653647006 | 0.500846982 | 0.422569007 |
| 0.888016999 | 0.499669999 | 0.361728013 |

CO~O\*

|    |    |   |   |
|----|----|---|---|
| Pt | Ni | O | C |
| 80 | 5  | 6 | 1 |

Direct

|             |             |             |
|-------------|-------------|-------------|
| 0.000000000 | 0.000000000 | 0.000000000 |
| 0.000000000 | 0.000000000 | 0.151810005 |
| 0.000311000 | 0.998495996 | 0.305575997 |
| 0.125000000 | 0.125000000 | 0.075900003 |
| 0.125808001 | 0.125719994 | 0.229359999 |
| 0.250000000 | 0.000000000 | 0.000000000 |
| 0.250000000 | 0.000000000 | 0.151810005 |
| 0.249557003 | 0.000125000 | 0.306497991 |
| 0.375000000 | 0.125000000 | 0.075900003 |
| 0.374976009 | 0.125845999 | 0.230039001 |
| 0.500000000 | 0.000000000 | 0.000000000 |
| 0.500000000 | 0.000000000 | 0.151810005 |
| 0.499577999 | 0.000413000 | 0.306791991 |
| 0.625000000 | 0.125000000 | 0.075900003 |
| 0.624022007 | 0.126044005 | 0.229778007 |
| 0.750000000 | 0.000000000 | 0.000000000 |
| 0.750000000 | 0.000000000 | 0.151810005 |
| 0.749504030 | 0.998467028 | 0.306066006 |
| 0.875000000 | 0.125000000 | 0.075900003 |
| 0.873929024 | 0.125893995 | 0.229624003 |
| 0.000000000 | 0.250000000 | 0.000000000 |
| 0.000000000 | 0.250000000 | 0.151810005 |
| 0.003011000 | 0.245528996 | 0.311096996 |
| 0.125000000 | 0.375000000 | 0.075900003 |
| 0.124139003 | 0.375829011 | 0.231103003 |
| 0.250000000 | 0.250000000 | 0.000000000 |
| 0.250000000 | 0.250000000 | 0.151810005 |
| 0.249766007 | 0.248142004 | 0.308306992 |
| 0.375000000 | 0.375000000 | 0.075900003 |
| 0.375254005 | 0.374466002 | 0.229877993 |
| 0.500000000 | 0.250000000 | 0.000000000 |

---

|             |             |             |
|-------------|-------------|-------------|
| 0.500000000 | 0.250000000 | 0.151810005 |
| 0.500684023 | 0.245767996 | 0.309345990 |
| 0.625000000 | 0.375000000 | 0.075900003 |
| 0.626830995 | 0.375851989 | 0.231191993 |
| 0.750000000 | 0.250000000 | 0.000000000 |
| 0.750000000 | 0.250000000 | 0.151810005 |
| 0.749001980 | 0.246111006 | 0.313937992 |
| 0.875000000 | 0.375000000 | 0.075900003 |
| 0.874529004 | 0.375945002 | 0.230774999 |
| 0.000000000 | 0.500000000 | 0.000000000 |
| 0.000000000 | 0.500000000 | 0.151810005 |
| 0.011787000 | 0.501809001 | 0.310061991 |
| 0.125000000 | 0.625000000 | 0.075900003 |
| 0.124107003 | 0.624440014 | 0.231110007 |
| 0.250000000 | 0.500000000 | 0.000000000 |
| 0.250000000 | 0.500000000 | 0.151810005 |
| 0.249597996 | 0.500159025 | 0.308326006 |
| 0.375000000 | 0.625000000 | 0.075900003 |
| 0.375196993 | 0.625819981 | 0.229861006 |
| 0.500000000 | 0.500000000 | 0.000000000 |
| 0.500000000 | 0.500000000 | 0.151810005 |
| 0.498569012 | 0.500302970 | 0.305765986 |
| 0.625000000 | 0.625000000 | 0.075900003 |
| 0.626854002 | 0.624419987 | 0.231232002 |
| 0.750000000 | 0.500000000 | 0.000000000 |
| 0.750000000 | 0.500000000 | 0.151810005 |
| 0.748296976 | 0.502771974 | 0.312480003 |
| 0.875000000 | 0.625000000 | 0.075900003 |
| 0.874544978 | 0.624278009 | 0.230758995 |
| 0.000000000 | 0.750000000 | 0.000000000 |
| 0.000000000 | 0.750000000 | 0.151810005 |
| 0.999900997 | 0.754818022 | 0.306225985 |
| 0.125000000 | 0.875000000 | 0.075900003 |
| 0.125771001 | 0.874538004 | 0.229358003 |
| 0.250000000 | 0.750000000 | 0.000000000 |
| 0.250000000 | 0.750000000 | 0.151810005 |
| 0.248941004 | 0.752493024 | 0.308396012 |
| 0.375000000 | 0.875000000 | 0.075900003 |
| 0.374909997 | 0.874516010 | 0.230018005 |
| 0.500000000 | 0.750000000 | 0.000000000 |
| 0.500000000 | 0.750000000 | 0.151810005 |
| 0.498587012 | 0.755666971 | 0.309547007 |
| 0.625000000 | 0.875000000 | 0.075900003 |
| 0.624045014 | 0.874240994 | 0.229788005 |



---

|             |             |             |
|-------------|-------------|-------------|
| 0.750000000 | 0.750000000 | 0.000000000 |
| 0.750000000 | 0.750000000 | 0.151810005 |
| 0.747987986 | 0.754307985 | 0.308456004 |
| 0.875000000 | 0.875000000 | 0.075900003 |
| 0.873921990 | 0.874361992 | 0.229609996 |
| 0.488846987 | 0.502319992 | 0.438484013 |
| 0.614188015 | 0.378385007 | 0.378390014 |
| 0.370810986 | 0.625124991 | 0.375553995 |
| 0.370703995 | 0.377047002 | 0.375966996 |
| 0.615225971 | 0.625446022 | 0.377748013 |
| 0.490449995 | 0.339121014 | 0.422360986 |
| 0.327731013 | 0.501577020 | 0.419636995 |
| 0.490788996 | 0.665062010 | 0.421602994 |
| 0.651072025 | 0.502363026 | 0.423272997 |
| 0.885767996 | 0.505021989 | 0.361032993 |
| 0.883467019 | 0.230693996 | 0.414032012 |
| 0.880236030 | 0.237222001 | 0.368490010 |

TS3

|    |    |   |   |
|----|----|---|---|
| Pt | Ni | O | C |
| 80 | 5  | 6 | 1 |

Direct

|             |             |             |
|-------------|-------------|-------------|
| 0.000000000 | 0.000000000 | 0.000000000 |
| 0.000000000 | 0.000000000 | 0.151810005 |
| 0.000311000 | 0.998495996 | 0.305575997 |
| 0.125000000 | 0.125000000 | 0.075900003 |
| 0.125808001 | 0.125719994 | 0.229359999 |
| 0.250000000 | 0.000000000 | 0.000000000 |
| 0.250000000 | 0.000000000 | 0.151810005 |
| 0.249557003 | 0.000125000 | 0.306497991 |
| 0.375000000 | 0.125000000 | 0.075900003 |
| 0.374976009 | 0.125845999 | 0.230039001 |
| 0.500000000 | 0.000000000 | 0.000000000 |
| 0.500000000 | 0.000000000 | 0.151810005 |
| 0.499577999 | 0.000413000 | 0.306791991 |
| 0.625000000 | 0.125000000 | 0.075900003 |
| 0.624022007 | 0.126044005 | 0.229778007 |
| 0.750000000 | 0.000000000 | 0.000000000 |
| 0.750000000 | 0.000000000 | 0.151810005 |
| 0.749504030 | 0.998467028 | 0.306066006 |
| 0.875000000 | 0.125000000 | 0.075900003 |
| 0.873929024 | 0.125893995 | 0.229624003 |
| 0.000000000 | 0.250000000 | 0.000000000 |
| 0.000000000 | 0.250000000 | 0.151810005 |

---

|             |              |             |
|-------------|--------------|-------------|
| 0.003011000 | 0.245528996  | 0.311096996 |
| 0.125000000 | 0.375000000  | 0.075900003 |
| 0.124139003 | 0.375829011  | 0.231103003 |
| 0.250000000 | 0.250000000  | 0.000000000 |
| 0.250000000 | 0.250000000  | 0.151810005 |
| 0.249766007 | 0.248142004  | 0.308306992 |
| 0.375000000 | 0.375000000  | 0.075900003 |
| 0.375254005 | 0.374466002  | 0.229877993 |
| 0.500000000 | 0.250000000  | 0.000000000 |
| 0.500000000 | 0.250000000  | 0.151810005 |
| 0.500684023 | 0.245767996  | 0.309345990 |
| 0.625000000 | 0.375000000  | 0.075900003 |
| 0.626830995 | 0.375851989  | 0.231191993 |
| 0.750000000 | 0.250000000  | 0.000000000 |
| 0.750000000 | 0.250000000  | 0.151810005 |
| 0.749001980 | 0.246111006  | 0.313937992 |
| 0.875000000 | 0.375000000  | 0.075900003 |
| 0.874529004 | 0.375945002  | 0.230774999 |
| 0.000000000 | 0.500000000  | 0.000000000 |
| 0.000000000 | 0.500000000  | 0.151810005 |
| 0.011787000 | 0.501809001  | 0.310061991 |
| 0.125000000 | 0.625000000  | 0.075900003 |
| 0.124107003 | 0.6244440014 | 0.231110007 |
| 0.250000000 | 0.500000000  | 0.000000000 |
| 0.250000000 | 0.500000000  | 0.151810005 |
| 0.249597996 | 0.500159025  | 0.308326006 |
| 0.375000000 | 0.625000000  | 0.075900003 |
| 0.375196993 | 0.625819981  | 0.229861006 |
| 0.500000000 | 0.500000000  | 0.000000000 |
| 0.500000000 | 0.500000000  | 0.151810005 |
| 0.498569012 | 0.500302970  | 0.305765986 |
| 0.625000000 | 0.625000000  | 0.075900003 |
| 0.626854002 | 0.624419987  | 0.231232002 |
| 0.750000000 | 0.500000000  | 0.000000000 |
| 0.750000000 | 0.500000000  | 0.151810005 |
| 0.748296976 | 0.502771974  | 0.312480003 |
| 0.875000000 | 0.625000000  | 0.075900003 |
| 0.874544978 | 0.624278009  | 0.230758995 |
| 0.000000000 | 0.750000000  | 0.000000000 |
| 0.000000000 | 0.750000000  | 0.151810005 |
| 0.999900997 | 0.754818022  | 0.306225985 |
| 0.125000000 | 0.875000000  | 0.075900003 |
| 0.125771001 | 0.874538004  | 0.229358003 |
| 0.250000000 | 0.750000000  | 0.000000000 |

---

|             |             |             |
|-------------|-------------|-------------|
| 0.250000000 | 0.750000000 | 0.151810005 |
| 0.248941004 | 0.752493024 | 0.308396012 |
| 0.375000000 | 0.875000000 | 0.075900003 |
| 0.374909997 | 0.874516010 | 0.230018005 |
| 0.500000000 | 0.750000000 | 0.000000000 |
| 0.500000000 | 0.750000000 | 0.151810005 |
| 0.498587012 | 0.755666971 | 0.309547007 |
| 0.625000000 | 0.875000000 | 0.075900003 |
| 0.624045014 | 0.874240994 | 0.229788005 |
| 0.750000000 | 0.750000000 | 0.000000000 |
| 0.750000000 | 0.750000000 | 0.151810005 |
| 0.747987986 | 0.754307985 | 0.308456004 |
| 0.875000000 | 0.875000000 | 0.075900003 |
| 0.873921990 | 0.874361992 | 0.229609996 |
| 0.488846987 | 0.502319992 | 0.438484013 |
| 0.614188015 | 0.378385007 | 0.378390014 |
| 0.370810986 | 0.625124991 | 0.375553995 |
| 0.370703995 | 0.377047002 | 0.375966996 |
| 0.615225971 | 0.625446022 | 0.377748013 |
| 0.490449995 | 0.339121014 | 0.422360986 |
| 0.327731013 | 0.501577020 | 0.419636995 |
| 0.490788996 | 0.665062010 | 0.421602994 |
| 0.651072025 | 0.502363026 | 0.423272997 |
| 0.885477006 | 0.456330001 | 0.362250000 |
| 0.885067999 | 0.269311011 | 0.413498014 |
| 0.883732975 | 0.296746999 | 0.368561000 |
